# Supplementary material for: Regulation of immune receptor kinase plasma membrane nanoscale organization by a plant peptide hormone and its receptors
Source: eLife journal article supplement (doi:10.7554/elife.74162), 2022-01-06

Source Data Figure 2 – supplement figure 2

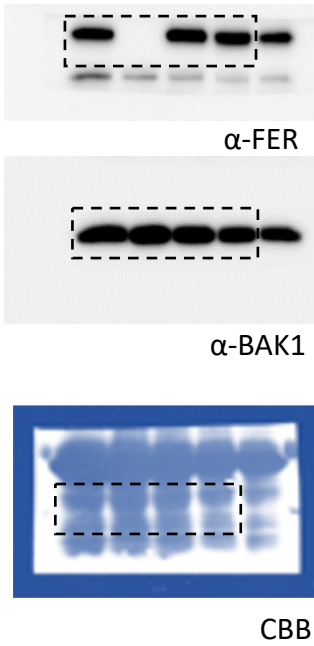

Supplement: supp [file elife-74162-supp-v1.zip]
