# Supplementary material for: Regulation of immune receptor kinase plasma membrane nanoscale organization by a plant peptide hormone and its receptors
Source: eLife journal article supplement (doi:10.7554/elife.74162), 2022-01-06
Supplement: supp [file elife-74162-supp-v1.zip]

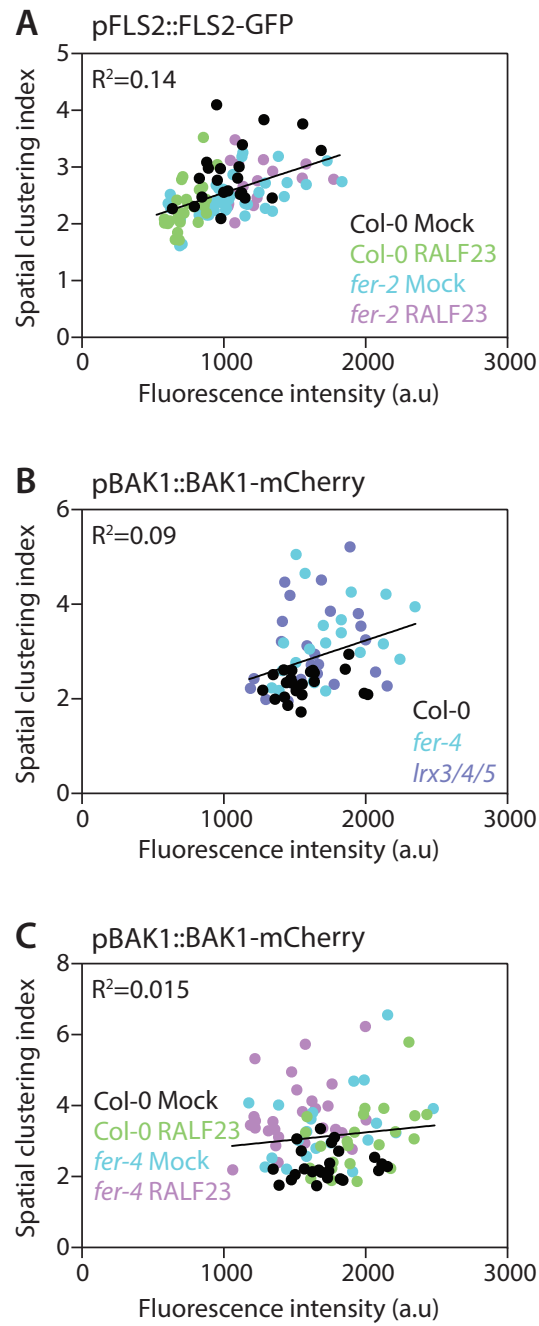

Figure 4 - supplement figure 7 | Linear regression analysis of the relationship between the spatial clustering index and fluorescence intensity.
