# Supplementary material for: Regulation of immune receptor kinase plasma membrane nanoscale organization by a plant peptide hormone and its receptors
Source: eLife journal article supplement (doi:10.7554/elife.74162), 2022-01-06
Supplement: supp [file elife-74162-supp-v1.zip]

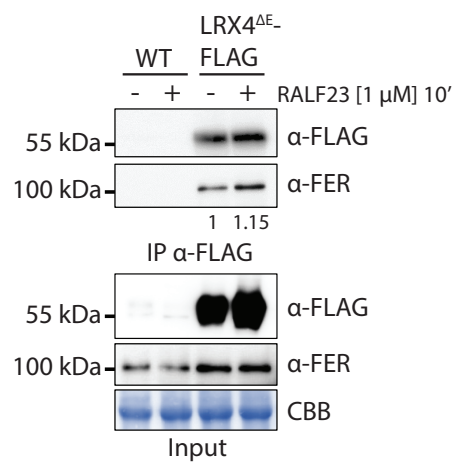

Figure 2 - supplement figure 5 | RALF23 does not modulate constitutive association between FER and LRX4.
