# Supplementary material for: Regulation of immune receptor kinase plasma membrane nanoscale organization by a plant peptide hormone and its receptors
Source: eLife journal article supplement (doi:10.7554/elife.74162), 2022-01-06
Supplement: supp [file elife-74162-supp-v1.zip]

Source Data Figure 4 – supplement figure 1

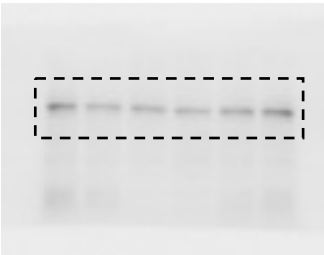

$\alpha$ -FLS2 input

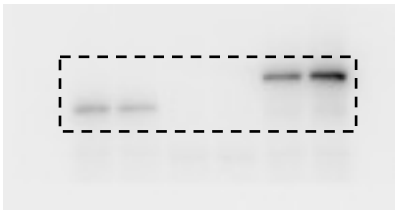

$\alpha$ -FER input

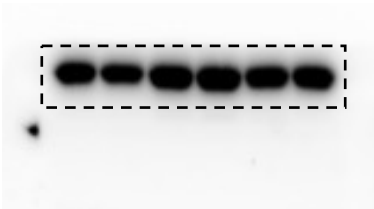

$\alpha$ -BAK1 input

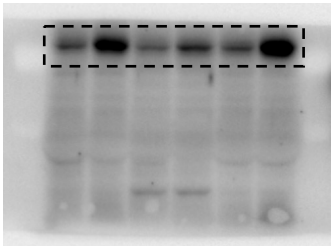

$\alpha$ -BAK1 pS612 input

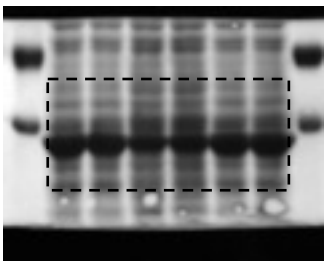

CBB input

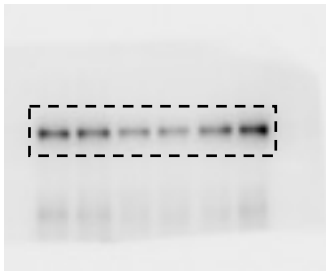

$\alpha$ -FLS2 IP

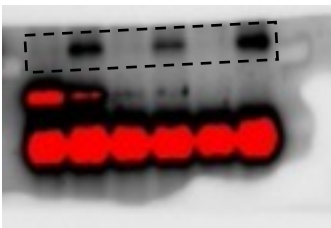

$\alpha$ -BAK1 Co-IP

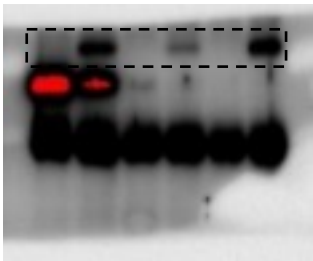

$\alpha$ -BAK1 pS612 Co-IP
