# Supplementary material for: Regulation of immune receptor kinase plasma membrane nanoscale organization by a plant peptide hormone and its receptors
Source: eLife journal article supplement (doi:10.7554/elife.74162), 2022-01-06
Supplement: supp [file elife-74162-supp-v1.zip]

Archive with 51 entries (51 files):
- elife_poa_e74162_Transparent_Reporting_File.pdf
- elife_poa_e74162_Figure_1_video_1.avi
- elife_poa_e74162_Figure_1_video_2.avi
- elife_poa_e74162_Figure_2_video_1.avi
- elife_poa_e74162_Figure_2_video_2.avi
- elife_poa_e74162_Figure_4_video_1.avi
- elife_poa_e74162_Figure_4_video_2.avi
- elife_poa_e74162_Figure_4_video_3.avi
- elife_poa_e74162_Figure_1_source_data_1.xlsx
- elife_poa_e74162_Figure_1_figure_supplement_1_source_data_1.xlsx
- elife_poa_e74162_Figure_1_figure_supplement_2_source_data_1.xlsx
- elife_poa_e74162_Figure_1_figure_supplement_3_source_data_1.xlsx
- elife_poa_e74162_Figure_2_source_data_1.xlsx
- elife_poa_e74162_Figure_2_source_data_2.pdf
- elife_poa_e74162_Figure_2_figure_supplement_1_source_data_1.xlsx
- elife_poa_e74162_Figure_2_figure_supplement_2_source_data_1.pdf
- elife_poa_e74162_Figure_2_figure_supplement_3_source_data_1.xlsx
- elife_poa_e74162_Figure_2_figure_supplement_4_source_data_1.xlsx
- elife_poa_e74162_Figure_2_figure_supplement_5_source_data_1.pdf
- elife_poa_e74162_Figure_3_source_data_1.xlsx
- elife_poa_e74162_Figure_3_source_data_2.pdf
- elife_poa_e74162_Figure_3_figure_supplement_1_source_data_1.xlsx
- elife_poa_e74162_Figure_3_figure_supplement_1_source_data_2.pdf
- elife_poa_e74162_Figure_4_source_data_1.xlsx
- elife_poa_e74162_Figure_4_figure_supplement_1_source_data_1.xlsx
- elife_poa_e74162_Figure_4_figure_supplement_1_source_data_2.pdf
- elife_poa_e74162_Figure_4_figure_supplement_2_source_data_1.xlsx
- elife_poa_e74162_Figure_4_figure_supplement_2_source_data_2.pdf
- elife_poa_e74162_Figure_4_figure_supplement_3_source_data_1.xlsx
- elife_poa_e74162_Figure_4_figure_supplement_4_source_data_1.xlsx
- elife_poa_e74162_Figure_4_figure_supplement_5_source_data_1.xlsx
- elife_poa_e74162_Figure_4_figure_supplement_7_source_data_1.xlsx
- elife_poa_e74162_Figure_4_figure_supplement_8_source_data_1.pdf
- elife_poa_e74162_Source_data_1.zip
- elife_poa_e74162_Figure_1_figure_supplement_1.pdf
- elife_poa_e74162_Figure_1_figure_supplement_2.pdf
- elife_poa_e74162_Figure_1_figure_supplement_3.pdf
- elife_poa_e74162_Figure_2_figure_supplement_1.pdf
- elife_poa_e74162_Figure_2_figure_supplement_2.pdf
- elife_poa_e74162_Figure_2_figure_supplement_3.pdf
- elife_poa_e74162_Figure_2_figure_supplement_4.pdf
- elife_poa_e74162_Figure_2_figure_supplement_5.pdf
- elife_poa_e74162_Figure_3_figure_supplement_1.pdf
- elife_poa_e74162_Figure_4_figure_supplement_1.pdf
- elife_poa_e74162_Figure_4_figure_supplement_2.pdf
- elife_poa_e74162_Figure_4_figure_supplement_3.pdf
- elife_poa_e74162_Figure_4_figure_supplement_4.pdf
- elife_poa_e74162_Figure_4_figure_supplement_5.pdf
- elife_poa_e74162_Figure_4_figure_supplement_6.pdf
- elife_poa_e74162_Figure_4_figure_supplement_7.pdf
- elife_poa_e74162_Figure_4_figure_supplement_8.pdf
