# Supplementary material for: Regulation of immune receptor kinase plasma membrane nanoscale organization by a plant peptide hormone and its receptors
Source: eLife journal article supplement (doi:10.7554/elife.74162), 2022-01-06
Supplement: supp [file elife-74162-supp-v1.zip › elife_poa_e74162_Figure_1_figure_supplement_1_source_data_1.xlsx]

## Sheet: Sheet1
pFLS2::FLS2-GFP
Experiment	Genotype	Values
1	Col-0	-1.59811		Experiment 1+2+3
1	Col-0	-1.64638		Mann Whitney test
1	Col-0	-1.95211		P value	<0.0001
1	Col-0	-1.69547		Exact or approximate P value?	Exact
1	Col-0	-1.72609		P value summary	****
1	Col-0	-1.71042		Significantly different (P < 0.05)?	Yes
1	Col-0	-1.76774		One- or two-tailed P value?	Two-tailed
1	fer-4	-1.5141		Sum of ranks in column A,B	285 , 618
1	fer-4	-1.56183		Mann-Whitney U	9
1	fer-4	-1.58971
1	fer-4	-1.6039		Difference between medians
1	fer-4	-1.66916		Median of Col-0	-1.710, n=23
1	fer-4	-1.52285		Median of fer-4	-1.523, n=19
2	Col-0	-1.71379		Difference: Actual	0.1876
2	Col-0	-1.71026		Difference: Hodges-Lehmann	0.1875
2	Col-0	-1.74561
2	Col-0	-1.6828		Experiment 1
2	Col-0	-1.69379		Mann Whitney test
2	Col-0	-1.6305		P value	0.0082
2	Col-0	-1.68576		Exact or approximate P value?	Exact
2	Col-0	-1.68304		P value summary	**
2	Col-0	-1.80751		Significantly different (P < 0.05)?	Yes
2	Col-0	-1.54116		One- or two-tailed P value?	Two-tailed
2	fer-4	-1.50797		Sum of ranks in column A,B	31 , 60
2	fer-4	-1.46894		Mann-Whitney U	3
2	fer-4	-1.49704
2	fer-4	-1.56517		Difference between medians
3	Col-0	-1.71361		Median of column A	-1.710, n=7
3	Col-0	-1.63078		Median of column B	-1.576, n=6
3	Col-0	-1.85055		Difference: Actual	0.1346
3	Col-0	-1.74989		Difference: Hodges-Lehmann	0.133
3	Col-0	-1.72609
3	Col-0	-1.71042		Experiment 2
3	Col-0	-1.70766		Mann Whitney test
3	fer-4	-1.37978		P value	0.001
3	fer-4	-1.46897		Exact or approximate P value?	Exact
3	fer-4	-1.53389		P value summary	***
3	fer-4	-1.58777		Significantly different (P < 0.05)?	Yes
3	fer-4	-1.65881		One- or two-tailed P value?	Two-tailed
3	fer-4	-1.47706		Sum of ranks in column A,B	45 , 60
3	fer-4	-1.39073		Mann-Whitney U	0
3	fer-4	-1.3981
				Difference between medians
				Median of column A	-1.694, n=9
				Median of column B	-1.508, n=5
				Difference: Actual	0.1858
				Difference: Hodges-Lehmann	0.1858
				Experiment 3
				Mann Whitney test
				P value	0.0006
				Exact or approximate P value?	Exact
				P value summary	***
				Significantly different (P < 0.05)?	Yes
				One- or two-tailed P value?	Two-tailed
				Sum of ranks in column A,B	29 , 91
				Mann-Whitney U	1
				Difference between medians
				Median of column A	-1.714, n=7
				Median of column B	-1.473, n=8
				Difference: Actual	0.2406
				Difference: Hodges-Lehmann	0.243
