# Supplementary material for: Regulation of immune receptor kinase plasma membrane nanoscale organization by a plant peptide hormone and its receptors
Source: eLife journal article supplement (doi:10.7554/elife.74162), 2022-01-06
Supplement: supp [file elife-74162-supp-v1.zip › elife_poa_e74162_Figure_1_figure_supplement_2_source_data_1.xlsx]

## Sheet: Sheet1
Figure 1 supplement figure 2B								Figure 1 supplement figure 2D
Experiment	Genotype	Values						Experiment	Genotype	Values
1	Col-0	-2.25661		Experiment 1+2+3				1	Col-0	3.33501		Experiment 1+2+3
1	Col-0	-2.18654		Mann Whitney test				1	Col-0	3.26678		Mann Whitney test
1	Col-0	-2.52642		P value	<0.0001			1	Col-0	2.65056		P value	<0.0001
1	Col-0	-2.1848		Exact or approximate P value?	Exact			1	Col-0	3.5966		Exact or approximate P value?	Exact
1	Col-0	-2.6418		P value summary	****			1	Col-0	3.52405		P value summary	****
1	Col-0	-2.6763		Significantly different (P < 0.05)?	Yes			1	Col-0	3.33415		Significantly different (P < 0.05)?	Yes
1	Col-0	-2.35066		One- or two-tailed P value?	Two-tailed			1	Col-0	1.97199		One- or two-tailed P value?	Two-tailed
1	Col-0	-2.60297		Sum of ranks in column A,B	1408 , 2508			1	Col-0	2.06786		Sum of ranks in column A,B	7185 , 4596
1	Col-0	-2.32578		Mann-Whitney U	232			1	Col-0	1.96296		Mann-Whitney U	1275
1	Col-0	-2.35918						1	Col-0	3.33868
1	Col-0	-2.33299		Difference between medians				1	Col-0	3.66439		Difference between medians
1	Col-0	-2.57666		Median of column A	-3.276, n=48			1	Col-0	2.43822		Median of column A	2.804, n=72
1	Col-0	-2.38861		Median of column B	-2.959, n=40			1	Col-0	2.2225		Median of column B	2.361, n=81
1	Col-0	-2.33156		Difference: Actual	0.3177			1	Col-0	3.38594		Difference: Actual	-0.443
1	Col-0	-2.38514		Difference: Hodges-Lehmann	0.3129			1	Col-0	2.58249		Difference: Hodges-Lehmann	-0.4646
1	Col-0	-2.37024						1	Col-0	2.75174
1	Col-0	-2.22571		Experiment 1				1	Col-0	3.04302		Experiment 1
1	Col-0	-2.35874		Mann Whitney test				1	Col-0	2.49058		Mann Whitney test
1	fer-2	-1.99989		P value	<0.0001			1	Col-0	2.77747		P value	0.0062
1	fer-2	-2.12933		Exact or approximate P value?	Exact			1	Col-0	2.08832		Exact or approximate P value?	Exact
1	fer-2	-2.15163		P value summary	****			1	Col-0	3.52304		P value summary	**
1	fer-2	-2.17072		Significantly different (P < 0.05)?	Yes			1	fer-2	2.8515		Significantly different (P < 0.05)?	Yes
1	fer-2	-2.3358		One- or two-tailed P value?	Two-tailed			1	fer-2	2.456		One- or two-tailed P value?	Two-tailed
1	fer-2	-2.45734		Sum of ranks in column A,B	212 , 529			1	fer-2	2.30554		Sum of ranks in column A,B	602 , 433
1	fer-2	-2.23302		Mann-Whitney U	41			1	fer-2	2.13697		Mann-Whitney U	133
1	fer-2	-2.20602						1	fer-2	2.66953
1	fer-2	-2.16618		Difference between medians				1	fer-2	2.75362		Difference between medians
1	fer-2	-2.03484		Median of column A	-3.276, n=18			1	fer-2	2.29277		Median of column A	2.777, n=21
1	fer-2	-2.04486		Median of column B	-2.987, n=20			1	fer-2	3.11676		Median of column B	2.339, n=24
1	fer-2	-2.15553		Difference: Actual	0.2895			1	fer-2	2.49674		Difference: Actual	-0.4385
1	fer-2	-2.16497		Difference: Hodges-Lehmann	0.3098			1	fer-2	2.15078		Difference: Hodges-Lehmann	-0.4991
1	fer-2	-2.06797						1	fer-2	1.85251
1	fer-2	-2.01065		Experiment 2				1	fer-2	2.21211		Experiment 2
1	fer-2	-2.03428		Mann Whitney test				1	fer-2	2.38072		Mann Whitney test
1	fer-2	-1.83932		P value	0.0064			1	fer-2	1.97209		P value	0.0009
1	fer-2	-2.03852		Exact or approximate P value?	Exact			1	fer-2	2.60451		Exact or approximate P value?	Exact
1	fer-2	-2.14939		P value summary	**			1	fer-2	2.1725		P value summary	***
1	fer-2	-2.61286		Significantly different (P < 0.05)?	Yes			1	fer-2	1.95443		Significantly different (P < 0.05)?	Yes
2	Col-0	-2.1497		One- or two-tailed P value?	Two-tailed			1	fer-2	2.53976		One- or two-tailed P value?	Two-tailed
2	Col-0	-2.32425		Sum of ranks in column A,B	122 , 131			1	fer-2	2.5366		Sum of ranks in column A,B	851 , 979
2	Col-0	-2.11761		Mann-Whitney U	17			1	fer-2	2.31695		Mann-Whitney U	199
2	Col-0	-2.21481						1	fer-2	2.33931
2	Col-0	-2.03679		Difference between medians				1	fer-2	2.33855		Difference between medians
2	Col-0	-2.26351		Median of column A	-3.113, n=14			1	fer-2	2.08398		Median of column A	2.803, n=21
2	Col-0	-2.22331		Median of column B	-2.851, n=8			1	fer-2	2.40337		Median of column B	2.410, n=39
2	Col-0	-2.16002		Difference: Actual	0.2623			2	Col-0	2.97955		Difference: Actual	-0.3925
2	Col-0	-2.26926		Difference: Hodges-Lehmann	0.2473			2	Col-0	2.80251		Difference: Hodges-Lehmann	-0.3571
2	Col-0	-1.9993						2	Col-0	3.08566
2	Col-0	-2.38085		Experiment 3				2	Col-0	2.54669		Experiment 3
2	Col-0	-2.47154		Mann Whitney test				2	Col-0	2.45697		Mann Whitney test
2	Col-0	-2.36429		P value	<0.0001			2	Col-0	2.45713		P value	0.0005
2	Col-0	-2.2595		Exact or approximate P value?	Exact			2	Col-0	3.29385		Exact or approximate P value?	Exact
2	fer-2	-2.02094		P value summary	****			2	Col-0	3.83468		P value summary	***
2	fer-2	-2.08415		Significantly different (P < 0.05)?	Yes			2	Col-0	3.76218		Significantly different (P < 0.05)?	Yes
2	fer-2	-2.17543		One- or two-tailed P value?	Two-tailed			2	Col-0	2.55814		One- or two-tailed P value?	Two-tailed
2	fer-2	-2.00703		Sum of ranks in column A,B	138 , 268			2	Col-0	2.47421		Sum of ranks in column A,B	893 , 283
2	fer-2	-1.97295		Mann-Whitney U	2			2	Col-0	2.30496		Mann-Whitney U	112
2	fer-2	-2.14378						2	Col-0	2.58034
2	fer-2	-1.91371		Difference between medians				2	Col-0	3.00644		Difference between medians
2	fer-2	-2.17793		Median of column A	-3.335, n=16			2	Col-0	2.80532		Median of column A	2.830, n=30
3	Col-0	-2.29846		Median of column B	-2.955, n=12			2	Col-0	2.97476		Median of column B	2.241, n=18
3	Col-0	-2.19074		Difference: Actual	0.3803			2	Col-0	2.0923		Difference: Actual	-0.5885
3	Col-0	-2.28822		Difference: Hodges-Lehmann	0.3785			2	Col-0	2.76977		Difference: Hodges-Lehmann	-0.5792
3	Col-0	-2.6898						2	Col-0	3.39178
3	Col-0	-2.31944						2	Col-0	4.09607
3	Col-0	-2.36197						2	Col-0	2.51715
3	Col-0	-2.61099						2	fer-2	3.18969
3	Col-0	-2.73055						2	fer-2	2.72853
3	Col-0	-2.63742						2	fer-2	2.4832
3	Col-0	-2.40337						2	fer-2	2.34221
3	Col-0	-2.39954						2	fer-2	3.18619
3	Col-0	-2.4072						2	fer-2	3.25481
3	Col-0	-2.38194						2	fer-2	2.15474
3	Col-0	-2.43396						2	fer-2	2.15525
3	Col-0	-2.42652						2	fer-2	2.41003
3	Col-0	-2.37456						2	fer-2	2.27773
3	fer-2	-2.12409						2	fer-2	2.51998
3	fer-2	-2.0793						2	fer-2	2.36091
3	fer-2	-2.08126						2	fer-2	2.42902
3	fer-2	-2.17256						2	fer-2	2.56468
3	fer-2	-2.05185						2	fer-2	2.27426
3	fer-2	-2.03368						2	fer-2	2.35666
3	fer-2	-2.21909						2	fer-2	2.62156
3	fer-2	-2.15376						2	fer-2	2.45917
3	fer-2	-2.18234						2	fer-2	2.8708
3	fer-2	-2.26973						2	fer-2	2.60957
3	fer-2	-2.11981						2	fer-2	2.71867
3	fer-2	-2.13113						2	fer-2	2.68177
								2	fer-2	2.37662
								2	fer-2	2.242
								2	fer-2	2.23384
								2	fer-2	2.22501
								2	fer-2	2.15618
								2	fer-2	2.49308
								2	fer-2	2.13996
								2	fer-2	2.36061
								2	fer-2	2.69525
								2	fer-2	2.74282
								2	fer-2	3.1109
								2	fer-2	2.27248
								2	fer-2	2.22288
								2	fer-2	2.55562
								2	fer-2	1.61343
								2	fer-2	1.64403
								2	fer-2	2.08638
								3	Col-0	2.83698
								3	Col-0	3.36033
								3	Col-0	2.69162
								3	Col-0	2.30286
								3	Col-0	3.67533
								3	Col-0	2.4515
								3	Col-0	3.14017
								3	Col-0	3.60011
								3	Col-0	2.74965
								3	Col-0	2.97486
								3	Col-0	4.46101
								3	Col-0	3.02051
								3	Col-0	2.39419
								3	Col-0	2.58468
								3	Col-0	2.78996
								3	Col-0	2.72501
								3	Col-0	2.887
								3	Col-0	2.74359
								3	Col-0	2.82278
								3	Col-0	2.98828
								3	Col-0	2.74783
								3	Col-0	4.05318
								3	Col-0	4.89025
								3	Col-0	2.50013
								3	Col-0	2.58334
								3	Col-0	3.55642
								3	Col-0	3.92175
								3	Col-0	3.28714
								3	Col-0	2.56117
								3	Col-0	2.58595
								3	fer-2	2.77876
								3	fer-2	2.06173
								3	fer-2	2.16341
								3	fer-2	1.91322
								3	fer-2	2.16454
								3	fer-2	1.82224
								3	fer-2	2.18474
								3	fer-2	2.29803
								3	fer-2	2.16426
								3	fer-2	1.84705
								3	fer-2	2.01194
								3	fer-2	2.48263
								3	fer-2	3.05506
								3	fer-2	2.5426
								3	fer-2	2.41436
								3	fer-2	2.99441
								3	fer-2	4.11879
								3	fer-2	3.52778
