# Supplementary material for: Regulation of immune receptor kinase plasma membrane nanoscale organization by a plant peptide hormone and its receptors
Source: eLife journal article supplement (doi:10.7554/elife.74162), 2022-01-06
Supplement: supp [file elife-74162-supp-v1.zip › elife_poa_e74162_Figure_1_figure_supplement_3_source_data_1.xlsx]

## Sheet: Sheet1
Figure 1 supplement figure 3B			Figure 1 supplement figure 3D
pFLS2::FLS2-GFP			pFLS2::FLS2-GFP
Col-0	fer-2		Col-0	fer-4
673.438	167.688		105.979	182.592
665.875	143.5		135.732	89.2926
700.062	143.562		369.793	108.27
659.25	159.188		294.687	120.523
590.75	116.062		450.82	149.521
636.625	144.375		119.037	111.475
596.625	119.312		130.23	99.6534
447.625	120.25		137.894	83.2073
532.562	107.688		103.276	97.4425
556	235.25		137.37	72.429
393.312	277.5		108.055	57.0669
360.938	258.375		154.698	44.8965
609.312	246		227.093	45.3434
507.688	219.312		89.9998	59.5469
650.938	138.5		275.727	40.5011
422.625	149.312		378.129	61.9323
404.25	223.5		145.062	50.0816
650.875	168.5		131.445	46.6668
601.75	161		170.207	45.1875
375.938	126.812		160.211	43.2733
435.875	142.688		123.769	75.8709
768.438	359.125		116.035	84.7228
278.5	730.938		163.451	71.6466
458.438	828.375		178.381	95.8388
421.688	429.25		89.6337	79.0437
481.75	466.625		131.211	125.084
371.688	799.188		235.161	127.782
425.938	615.875		132.526	89.7801
376.812	642.625		131.796	183.956
415.938	822.375		167.973	121.13
532.688	628.438		149.209	110.752
472.625	762.562		150.916	83.5881
397.625	641.75		210.84	101.552
440.812	457.688		147.3	106.638
480	466.688		115.989	119.4
538.25	375.938		199.465	103.196
516.688	366.75		186.224	125.243
675.062	370		107.245	109.005
527.625	359.312		504.801	110.272
520.062	508.438		765.332	126.989
512.75	365		303.589	76.0046
675	411		382.755	94.0612
452.562	281.688		403.618	129.027
480.938	251.688		418.626	118.813
358.375	231.812		359.863	157.919
693.375	271.75		639.641	109.935
535.062	285.25		104.536	98.3705
270.125	198.562		167.967	91.0935
425.062	186.875		210.2	71.5006
415.125	185.062		113.415	73.9715
461.812	166		136.075	74.6706
401.812			125.609	69.8695
369.188			252.246	55.5888
658.312			211.771	69.1844
362.5			281.682	78.675
653.375			144.979	113.207
448.375			186.197	119.861
411.812				131.066
665.938				154.893
445.938				137.223
425.812				132.145
482.5				70.7413
331				51.1436
433.438				55.9217
330.125				56.4031
543.562				58.571
406.75				82.4564
613.312				97.3192
421.688				81.3745
471				99.4062
366.75				104.536
537.562
401.75
313.5
429.938
314.125
364.25
476
