# Supplementary material for: Regulation of immune receptor kinase plasma membrane nanoscale organization by a plant peptide hormone and its receptors
Source: eLife journal article supplement (doi:10.7554/elife.74162), 2022-01-06
Supplement: supp [file elife-74162-supp-v1.zip › elife_poa_e74162_Figure_1_source_data_1.xlsx]

## Sheet: Fig1A
Figure 1C | pFLS2::FLS2-GFP							Figure 1G | pBAK1::BAK1-mCherry
Experiment	Genotype	Values					Experiment	Genotype	Values
1	Col-0	2.7194		Experiment 1+2+3			1	Col-0	2.44182		Experiment 1+2+3
1	Col-0	3.1784		Mann Whitney test			1	Col-0	2.88711		Mann Whitney test
1	Col-0	3.65357		P value	<0.0001		1	Col-0	2.37212		P value	<0.0001
1	Col-0	3.44979		Exact or approximate P value?	Exact		1	Col-0	2.24032		Exact or approximate P value?	Exact
1	Col-0	3.81376		P value summary	****		1	Col-0	2.48871		P value summary	****
1	Col-0	3.03269		Significantly different (P < 0.05)?	Yes		1	Col-0	3.68844		Significantly different (P < 0.05)?	Yes
1	Col-0	3.75972		One- or two-tailed P value?	Two-tailed		1	Col-0	2.38537		One- or two-tailed P value?	Two-tailed
1	Col-0	3.18702		Sum of ranks in column A,B	3586 , 2630		1	Col-0	2.5646		Sum of ranks in column A,B	3123 , 4380
1	Col-0	3.66422		Mann-Whitney U	614		1	Col-0	3.60699		Mann-Whitney U	777
1	Col-0	5.32996					1	Col-0	2.87363
1	Col-0	3.80286		Difference between medians			1	Col-0	4.02152		Difference between medians
1	Col-0	4.02858		Median of Col-0	3.607, n=48		1	Col-0	3.53508		Median of Col-0	2.539, n=68
1	Col-0	4.25141		Median of fer-4	2.605, n=63		1	Col-0	4.6883		Median of fer-4	3.759, n=54
1	Col-0	3.1917		Difference: Actual	-1.002		1	Col-0	2.89898		Difference: Actual	1.22
1	Col-0	3.5665		Difference: Hodges-Lehmann	-0.887		1	Col-0	3.97702		Difference: Hodges-Lehmann	1.092
1	Col-0	5.09378					1	Col-0	4.81113
1	fer-4	2.67596		Experiment 1			1	Col-0	3.39298		Experiment 1
1	fer-4	2.17546		Mann Whitney test			1	Col-0	2.53115		Mann Whitney test
1	fer-4	2.27376		P value	0.0019		1	Col-0	5.19926		P value	0.0017
1	fer-4	2.4579		Exact or approximate P value?	Exact		1	Col-0	4.28939		Exact or approximate P value?	Exact
1	fer-4	3.49661		P value summary	**		1	Col-0	2.68776		P value summary	**
1	fer-4	2.62943		Significantly different (P < 0.05)?	Yes		1	Col-0	4.17557		Significantly different (P < 0.05)?	Yes
1	fer-4	2.64366		One- or two-tailed P value?	Two-tailed		1	Col-0	3.23027		One- or two-tailed P value?	Two-tailed
1	fer-4	2.35249		Sum of ranks in column A,B	344 , 184		1	Col-0	3.66498		Sum of ranks in column A,B	395 , 508
1	fer-4	3.40792		Mann-Whitney U	48		1	fer-4	6.67507		Mann-Whitney U	95
1	fer-4	3.16432					1	fer-4	4.68599
1	fer-4	4.58561		Difference between medians			1	fer-4	3.71697		Difference between medians
1	fer-4	3.32691		Median of Col-0	3.659, n=16		1	fer-4	3.58866		Median of Col-0	3.312, n=24
1	fer-4	3.39742		Median of fer-4	3.078, n=16		1	fer-4	4.04363		Median of fer-4	4.335, n=18
1	fer-4	2.9925		Difference: Actual	-0.5805		1	fer-4	5.26432		Difference: Actual	1.024
1	fer-4	3.28486		Difference: Hodges-Lehmann	-0.6422		1	fer-4	3.78167		Difference: Hodges-Lehmann	1.059
1	fer-4	3.38275					1	fer-4	9.2702
2	Col-0	2.85639		Experiment 2			1	fer-4	3.29168		Experiment 2
2	Col-0	3.35341		Mann Whitney test			1	fer-4	4.21723		Mann Whitney test
2	Col-0	2.58635		P value	0.0008		1	fer-4	4.71516		P value	0.0006
2	Col-0	3.09256		Exact or approximate P value?	Exact		1	fer-4	2.92192		Exact or approximate P value?	Exact
2	Col-0	2.54968		P value summary	***		1	fer-4	5.2699		P value summary	***
2	Col-0	2.98291		Significantly different (P < 0.05)?	Yes		1	fer-4	5.27409		Significantly different (P < 0.05)?	Yes
2	Col-0	2.80457		One- or two-tailed P value?	Two-tailed		1	fer-4	4.45372		One- or two-tailed P value?	Two-tailed
2	Col-0	3.78335		Sum of ranks in column A,B	839 , 814		1	fer-4	3.2109		Sum of ranks in column A,B	285 , 381
2	Col-0	2.55853		Mann-Whitney U	184		1	fer-4	6.01081		Mann-Whitney U	54
2	Col-0	2.96703					1	fer-4	2.71233
2	Col-0	2.31357		Difference between medians			2	Col-0	2.45768		Difference between medians
2	Col-0	3.25974		Median of Col-0	2.912, n=22		2	Col-0	2.02811		Median of Col-0	2.459, n=21
2	Col-0	2.51624		Median of fer-4	2.401, n=35		2	Col-0	2.45935		Median of fer-4	4.289, n=15
2	Col-0	3.85256		Difference: Actual	-0.5108		2	Col-0	1.89605		Difference: Actual	1.829
2	Col-0	3.01142		Difference: Hodges-Lehmann	-0.4193		2	Col-0	1.87303		Difference: Hodges-Lehmann	1.457
2	Col-0	2.32357					2	Col-0	2.05056
2	Col-0	2.55182		Experiment 3			2	Col-0	3.79323		Experiment 3
2	Col-0	3.7842		Mann Whitney test			2	Col-0	2.82509		Mann Whitney test
2	Col-0	2.08355		P value	<0.0001		2	Col-0	2.54637		P value	<0.0001
2	Col-0	2.48313		Exact or approximate P value?	Exact		2	Col-0	2.53202		Exact or approximate P value?	Exact
2	Col-0	4.13145		P value summary	****		2	Col-0	3.91034		P value summary	****
2	fer-4	2.09517		Significantly different (P < 0.05)?	Yes		2	Col-0	5.09401		Significantly different (P < 0.05)?	Yes
2	fer-4	2.15272		One- or two-tailed P value?	Two-tailed		2	Col-0	2.9516		One- or two-tailed P value?	Two-tailed
2	fer-4	2.27269		Sum of ranks in column A,B	182 , 71		2	Col-0	1.85708		Sum of ranks in column A,B	344 , 646
2	fer-4	2.52002		Mann-Whitney U	5		2	Col-0	3.79694		Mann-Whitney U	68
2	fer-4	2.88011					2	Col-0	2.54805
2	fer-4	2.35964		Difference between medians			2	Col-0	2.36229		Difference between medians
2	fer-4	2.62146		Median of column A	5.494, n=11		2	Col-0	3.73286		Median of Col-0	2.212, n=23
2	fer-4	1.62342		Median of column B	3.005, n=11		2	Col-0	2.41702		Median of fer-4	3.236, n=21
2	fer-4	2.73151		Difference: Actual	-2.489		2	Col-0	2.36149		Difference: Actual	1.024
2	fer-4	2.27203		Difference: Hodges-Lehmann	-2.489		2	Col-0	1.8519		Difference: Hodges-Lehmann	0.9038
2	fer-4	2.37151					2	fer-4	3.4786
2	fer-4	3.23473					2	fer-4	3.31415
2	fer-4	2.73983					2	fer-4	5.02815
2	fer-4	2.15547					2	fer-4	4.28879
2	fer-4	2.34051					2	fer-4	4.63431
2	fer-4	3.19013					2	fer-4	5.8161
2	fer-4	2.28071					2	fer-4	5.20362
2	fer-4	1.65702					2	fer-4	3.73561
2	fer-4	2.70534					2	fer-4	6.85849
2	fer-4	2.4762					2	fer-4	3.38509
2	fer-4	3.1017					2	fer-4	6.97657
2	fer-4	2.69073					2	fer-4	4.44723
2	fer-4	2.48961					2	fer-4	3.04871
2	fer-4	3.18725					2	fer-4	2.03447
2	fer-4	2.15477					2	fer-4	2.49737
2	fer-4	2.60483					3	Col-0	2.37806
2	fer-4	2.23101					3	Col-0	2.96195
2	fer-4	2.45819					3	Col-0	2.71652
2	fer-4	2.14096					3	Col-0	3.06566
2	fer-4	2.71247					3	Col-0	3.34948
2	fer-4	2.40091					3	Col-0	2.72254
2	fer-4	2.3525					3	Col-0	2.21866
2	fer-4	2.22707					3	Col-0	1.90711
2	fer-4	2.65432					3	Col-0	1.93438
2	fer-4	2.24301					3	Col-0	1.89984
2	fer-4	1.73529					3	Col-0	1.74342
3	Col-0	5.48357					3	Col-0	2.28257
3	Col-0	3.64773					3	Col-0	2.35677
3	Col-0	5.11907					3	Col-0	2.17105
3	Col-0	5.49435					3	Col-0	2.21203
3	Col-0	4.26189					3	Col-0	1.75772
3	Col-0	7.56787					3	Col-0	2.13653
3	Col-0	6.38577					3	Col-0	2.54594
3	Col-0	5.92548					3	Col-0	3.10113
3	Col-0	7.15946					3	Col-0	2.12216
3	Col-0	5.97385					3	Col-0	2.18087
3	Col-0	5.34596					3	Col-0	1.96081
3	Col-0	5.27463					3	Col-0	2.05851
3	fer-4	3.00494					3	fer-4	2.27286
3	fer-4	4.20206					3	fer-4	4.07381
3	fer-4	4.04791					3	fer-4	4.01636
3	fer-4	4.43052					3	fer-4	2.52543
3	fer-4	3.00008					3	fer-4	3.2732
3	fer-4	3.77881					3	fer-4	2.21279
3	fer-4	3.24518					3	fer-4	2.13997
3	fer-4	2.94789					3	fer-4	3.03049
3	fer-4	2.46326					3	fer-4	3.23628
3	fer-4	1.96385					3	fer-4	3.50625
3	fer-4	1.73649					3	fer-4	3.91719
3	fer-4	2.36472					3	fer-4	2.797
							3	fer-4	2.57103
							3	fer-4	3.80237
							3	fer-4	4.72222
							3	fer-4	6.55751
							3	fer-4	4.68874
							3	fer-4	3.02597
							3	fer-4	3.62612
							3	fer-4	2.95205
							3	fer-4	2.72377
