# Supplementary material for: Regulation of immune receptor kinase plasma membrane nanoscale organization by a plant peptide hormone and its receptors
Source: eLife journal article supplement (doi:10.7554/elife.74162), 2022-01-06
Supplement: supp [file elife-74162-supp-v1.zip › elife_poa_e74162_Figure_2_figure_supplement_1_source_data_1.xlsx]

## Sheet: Sheet1
Figure 2 supplement figure 1B
pBAK1::BAK1-mCherry
Col-0	fer-4	lrx3/4/5
729.592	650.092	339.104
697.373	441.909	409.517
746.578	507.985	660.486
590.129	524.83	660.334
638.316	615.533	604.214
617.814	553.194	629.27
594.994	584.659	546.111
594.818	514.423	497.564
551.226	557.563	581.952
574.598	767.646	427.469
641.536	723.938	497.85
645.466	800.176	501.136
728.012	789.054	440.822
623.325	546.523	536.995
577.694	589.341	543.014
595.296	561.686	521.322
552.068	554.779	452.672
617.95	560.598	490.751
561.64	576.529	511.404
571.348	500	547.15
567.267	611.64	537.656
603.972	586.622	434.348
594.777	526.488	553.204
687.121	446.144	620.333
625.989	937.003	540.356
763.8	784.752	409.758
601.386	789.443	464.258
560.915		605.572
615.623		632.772
700.471		671.089
618.434		700.234
650.509		651.314
623.296		683.065
658.094		702.632
642.529		661.331
614.353		698.01
639.428		659.339
529.493		747.042
559.047		717.831
840.287		667.194
707.897		685.593
635.261		564.093
536.125		617.567
675.7		635.218
619.805		427.814
687.346		431.66
727.871		478.684
630.064		496.495
776.251		479.877
433.37		505.526
503.705		524.163
403.663		472.027
466.787		501.276
501.803		515.33
498.113		479.742
470.015		478.276
553.662		504.242
616.854		418.65
595.124		424.311
536.439		481.463
466.681		501.12
501.037		494.465
496.596		485.364
511.786		473.683
474.003		559.824
469.171		595.501
466.682		548.01
558.611		628.982
512.523		548.607
497.728		421.217
524.83		964.447
455.826		1029.86
498.294		1336.38
508.365		745.617
417.23		652.459
495.382		553.201
551.893		901.184
544.415		560.562
559.324		493.149
548.732		631.712
531.424		503.328
576.22		505.204
556.103		429.015
578.299		513.193
616.805		460.412
524.524		614.292
572.583		654.82
526.846		724.97
478.91		644.471
501.595		627.314
466.787		540.722
610.153		456.14
533.515		472.447
499.248		554.138
563.024		527.494
515.969		589.792
562.099		480.03
530.427		474.01
497.803		512.838
521.122		627.498
559.617		559.322
665.944		594.368
625.21		571.298
624.947		440.13
479.163		445.93
462.565		509.034
447.458		531.201
464.536		376.223
632.313		392.841
647.167		370.285
625.701		799
626.833		525.408
471.633		709.428
469.897		503.15
707.196		542.776
		555.713
		543.56
		551.579
		530.085
		502.557
		486.623
		495.012
		543.302
		501.732
		513.178
