# Supplementary material for: Regulation of immune receptor kinase plasma membrane nanoscale organization by a plant peptide hormone and its receptors
Source: eLife journal article supplement (doi:10.7554/elife.74162), 2022-01-06
Supplement: supp [file elife-74162-supp-v1.zip › elife_poa_e74162_Figure_2_figure_supplement_2.pdf]

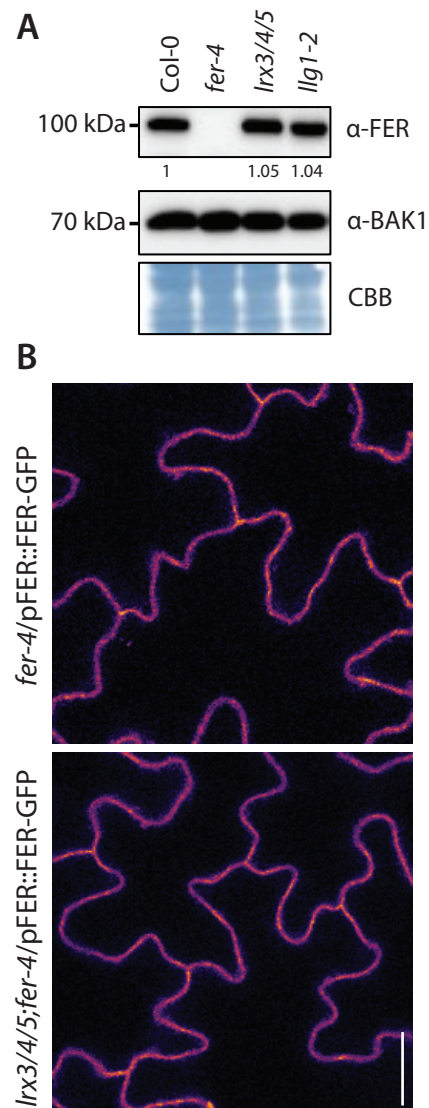

Figure 2 - supplement figure 2 | LRX3, LRX4 and LRX5 are dispensable for FER plasma membrane localization and accumulation.
