# Supplementary material for: Regulation of immune receptor kinase plasma membrane nanoscale organization by a plant peptide hormone and its receptors
Source: eLife journal article supplement (doi:10.7554/elife.74162), 2022-01-06
Supplement: supp [file elife-74162-supp-v1.zip › elife_poa_e74162_Figure_2_figure_supplement_3_source_data_1.xlsx]

## Sheet: Sheet1
Figure 2 supplement 3C
Experiment	Genotype	Values
1	fer-4	2.53765
1	fer-4	3.38338		Experiment 1+2+3
1	fer-4	2.59742		Mann Whitney test
1	fer-4	2.74285		P value	0.0229
1	fer-4	3.17596		Exact or approximate P value?	Exact
1	fer-4	4.36008		P value summary	*
1	fer-4	4.13918		Significantly different (P < 0.01)?	No
1	fer-4	4.02554		One- or two-tailed P value?	Two-tailed
1	fer-4	4.01814		Sum of ranks in column A,B	4466 , 3535
1	fer-4	3.32005		Mann-Whitney U	1519
1	fer-4	3.76559
1	fer-4	4.18751		Difference between medians
1	fer-4	5.62358		Median of column A	3.383, n=63
1	fer-4	3.49147		Median of column B	3.068, n=63
1	fer-4	4.03671		Difference: Actual	-0.3152
1	fer-4	3.23569		Difference: Hodges-Lehmann	-0.2745
1	fer-4	3.65567		99.01% CI of difference	-0.5694 to 0.04719
1	fer-4	3.50869		Exact or approximate CI?	Exact
1	fer-4	2.48082
1	fer-4	2.91395		Experiment 1
1	fer-4	2.82031		Mann Whitney test
1	fer-4	3.43546		P value	0.3302
1	fer-4/lrx345	3.20835		Exact or approximate P value?	Exact
1	fer-4/lrx345	3.03883		P value summary	ns
1	fer-4/lrx345	3.20223		Significantly different (P < 0.05)?	No
1	fer-4/lrx345	3.13571		One- or two-tailed P value?	Two-tailed
1	fer-4/lrx345	3.4226		Sum of ranks in column A,B	491 , 412
1	fer-4/lrx345	2.73832		Mann-Whitney U	181
1	fer-4/lrx345	3.93125
1	fer-4/lrx345	3.99324		Difference between medians
1	fer-4/lrx345	3.84843		Median of column A	3.491, n=21
1	fer-4/lrx345	3.63997		Median of column B	3.208, n=21
1	fer-4/lrx345	3.13191		Difference: Actual	-0.2831
1	fer-4/lrx345	3.60462		Difference: Hodges-Lehmann	-0.1771
1	fer-4/lrx345	3.7465
1	fer-4/lrx345	2.94674		Experiment 2
1	fer-4/lrx345	3.86065		Mann Whitney test
1	fer-4/lrx345	3.06204		P value	0.5557
1	fer-4/lrx345	3.85538		Exact or approximate P value?	Exact
1	fer-4/lrx345	2.29918		P value summary	ns
1	fer-4/lrx345	2.18523		Significantly different (P < 0.05)?	No
1	fer-4/lrx345	3.19902		One- or two-tailed P value?	Two-tailed
2	fer-4	4.60192		Sum of ranks in column A,B	323 , 238
2	fer-4	3.21338		Mann-Whitney U	118
2	fer-4	2.69768
2	fer-4	4.05727		Difference between medians
2	fer-4	2.66302		Median of column A	3.430, n=18
2	fer-4	4.18126		Median of column B	3.152, n=15
2	fer-4	3.31746		Difference: Actual	-0.2772
2	fer-4	3.66648		Difference: Hodges-Lehmann	-0.152
2	fer-4	3.1959
2	fer-4	3.5419		Experiment 3
2	fer-4	3.78182		Mann Whitney test
2	fer-4	4.0726		P value	0.0314
2	fer-4	3.28355		Exact or approximate P value?	Exact
2	fer-4	2.96145		P value summary	*
2	fer-4	4.52956		Significantly different (P < 0.05)?	Yes
2	fer-4	2.27683		One- or two-tailed P value?	Two-tailed
2	fer-4	2.09017		Sum of ranks in column A,B	738 , 588
2	fer-4	3.90977		Mann-Whitney U	210
2	fer-4/lrx345	4.1376
2	fer-4/lrx345	4.31435		Difference between medians
2	fer-4/lrx345	2.95197		Median of column A	3.168, n=24
2	fer-4/lrx345	4.67566		Median of column B	2.801, n=27
2	fer-4/lrx345	4.9697		Difference: Actual	-0.3665
2	fer-4/lrx345	3.68602		Difference: Hodges-Lehmann	-0.356
2	fer-4/lrx345	2.3584
2	fer-4/lrx345	3.03704
2	fer-4/lrx345	2.03603
2	fer-4/lrx345	2.94275
2	fer-4/lrx345	3.17228
2	fer-4/lrx345	2.79599
2	fer-4/lrx345	3.10163
2	fer-4/lrx345	3.15243
2	fer-4/lrx345	3.20018
3	fer-4	3.15998
3	fer-4	3.07387
3	fer-4	3.52408
3	fer-4	4.42096
3	fer-4	3.96833
3	fer-4	2.49703
3	fer-4	2.81036
3	fer-4	3.38812
3	fer-4	2.45315
3	fer-4	3.49976
3	fer-4	3.4458
3	fer-4	3.61006
3	fer-4	3.40026
3	fer-4	2.85804
3	fer-4	3.91181
3	fer-4	2.21772
3	fer-4	3.17592
3	fer-4	2.94081
3	fer-4	2.18404
3	fer-4	2.49158
3	fer-4	3.50216
3	fer-4	3.8302
3	fer-4	2.60539
3	fer-4	2.69271
3	fer-4/lrx345	4.00534
3	fer-4/lrx345	3.04289
3	fer-4/lrx345	3.0682
3	fer-4/lrx345	2.71404
3	fer-4/lrx345	2.86993
3	fer-4/lrx345	2.80144
3	fer-4/lrx345	3.23415
3	fer-4/lrx345	2.60635
3	fer-4/lrx345	2.65793
3	fer-4/lrx345	2.46783
3	fer-4/lrx345	1.98178
3	fer-4/lrx345	2.26311
3	fer-4/lrx345	2.7399
3	fer-4/lrx345	3.1114
3	fer-4/lrx345	3.15374
3	fer-4/lrx345	2.4526
3	fer-4/lrx345	2.38528
3	fer-4/lrx345	2.86639
3	fer-4/lrx345	3.10804
3	fer-4/lrx345	3.71569
3	fer-4/lrx345	3.12155
3	fer-4/lrx345	2.25072
3	fer-4/lrx345	2.88878
3	fer-4/lrx345	2.61366
3	fer-4/lrx345	2.3513
3	fer-4/lrx345	2.38852
3	fer-4/lrx345	2.89743
3	fer-4/lrx345	2.62595
