# Supplementary material for: Regulation of immune receptor kinase plasma membrane nanoscale organization by a plant peptide hormone and its receptors
Source: eLife journal article supplement (doi:10.7554/elife.74162), 2022-01-06
Supplement: supp [file elife-74162-supp-v1.zip › elife_poa_e74162_Figure_2_figure_supplement_4_source_data_1.xlsx]

## Sheet: Sheet1
Figure 2 supplement figure 4A
Col-0		lrx3/4/5
elf18	elf18+RALF23	elf18	elf18+RALF23
3.7849	2.1227	2.538	3.52
5.8477	2.2602	2.2583	4.2802
5.0799	2.3992	2.5541	3.1858
7.0957	3.2923	2.601	5.5484
5.37	2.3151	4.4244	3.3728
5.769	2.4573	5.7907	2.7274
3.4824	3.1063	3.3073	3.871
5.2274	2.2522	2.4364	3.06
3.0531	2.0349	1.3445	3.5582
2.5901	2.0095	5.5835	3.6655
3.3477	1.625	3.4978	2.9022
3.1791	2.3091	4.1874	1.3761
Figure 2 supplement figure 4AB
RALF23
Col-0	fer-4	lrx3/4/5
0.814815	1.26036	0.603774
0.592593	0.995025	0.687631
0.539683	1.07463	0.45283
0.433862	0.915423	0.737945
0.359788	1.00829	0.620545
0.402116	1.12769	0.872117
0.296296	0.477612	0.754717
0.465608	0.908517	0.486373
0.221384	0.921136
0.191195	0.820189
0.261635	0.656151
0.296855	0.958991
0.447799	1.19874
0.216352	0.921136
0.216352
0.140881
