# Supplementary material for: Regulation of immune receptor kinase plasma membrane nanoscale organization by a plant peptide hormone and its receptors
Source: eLife journal article supplement (doi:10.7554/elife.74162), 2022-01-06
Supplement: supp [file elife-74162-supp-v1.zip › elife_poa_e74162_Figure_2_figure_supplement_5_source_data_1.pdf]

Source Data Figure 2 – supplement figure 5

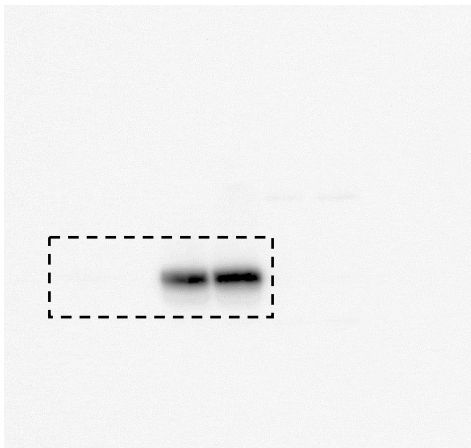

$\alpha$ -FLAG IP

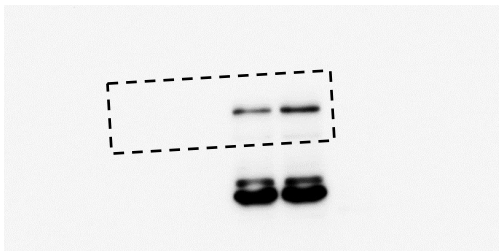

$\alpha$ -FER Co-IP

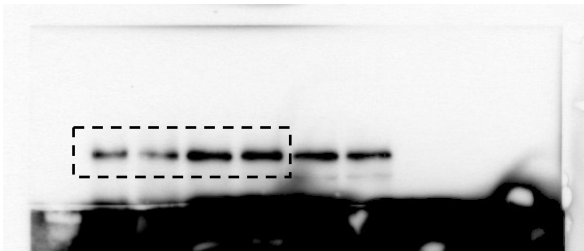

$\alpha$ -FER input

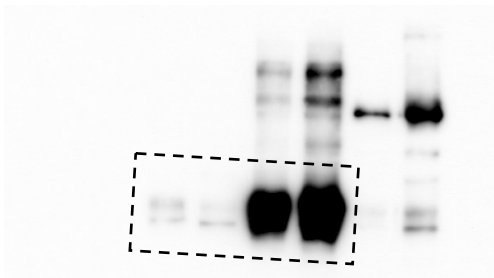

$\alpha$ -FLAG input

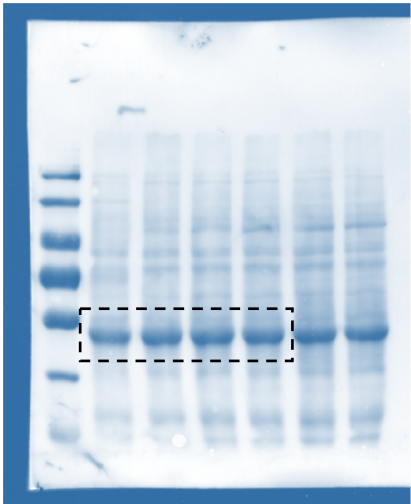

CBB
