# Supplementary material for: Regulation of immune receptor kinase plasma membrane nanoscale organization by a plant peptide hormone and its receptors
Source: eLife journal article supplement (doi:10.7554/elife.74162), 2022-01-06
Supplement: supp [file elife-74162-supp-v1.zip › elife_poa_e74162_Figure_2_source_data_1.xlsx]

## Sheet: Sheet1
Fig2B				Fig2F
flg22				Experiment	Genotype	Values
Col-0	fer-4	lrx3/4/5		1	Col-0	2.15637		Experiment 1+2+3
4.445	2.397	1.114		1	Col-0	2.37806		Number of families	1
4.146	0.966	1.039		1	Col-0	2.96195		Number of comparisons per family	3
3.77	1.209	1.418		1	Col-0	2.71652		Alpha	0.05
4.82	1.113	0.653		1	Col-0	3.06566
3.604	1.576	1.414		1	Col-0	3.34948		Dunn's multiple comparisons test	Mean rank diff.	Significant?	Summary	Adjusted P Value
5.773	0.685	0.864		1	Col-0	2.72254		Col-0 vs. fer-4	-82.61	Yes	****	<0.0001	A-B
1.708	1.563	1.27		1	Col-0	2.21866		Col-0 vs. lrx345	-59.81	Yes	****	<0.0001	A-C
5.057	0.719	0.545		1	Col-0	1.90711		fer-4 vs. lrx345	22.8	No	ns	0.1034	B-C
5.163	2.354	1.505		1	Col-0	1.93438
4.746	1.843	0.805		1	Col-0	1.89984		Test details	Mean rank 1	Mean rank 2	Mean rank diff.	n1	n2	Z
4.404	1.507	1.413		1	Col-0	1.74342		Col-0 vs. fer-4	66.06	148.7	-82.61	77	62	7.538
3.926	0.626	0.607		1	Col-0	2.28257		Col-0 vs. lrx345	66.06	125.9	-59.81	77	83	5.886
3.434	1.608	1.294		1	Col-0	2.35677		fer-4 vs. lrx345	148.7	125.9	22.8	62	83	2.114
4.989	0.965	0.779		1	Col-0	2.17105
5.127	1.421	2.279		1	Col-0	2.21203
1.976	0.972	0.895		1	Col-0	1.75772		Experiment 1
5.547	0.77	0.805		1	Col-0	2.13653		Number of families	1
2.546	3.205	2.929		1	Col-0	2.54594		Number of comparisons per family	3
2.28	1.325	1.141		1	Col-0	3.10113		Alpha	0.05
1.655	5.981	8.185		1	Col-0	2.12216
4.505	0.608	0.352		1	Col-0	2.18087		Dunn's multiple comparisons test	Mean rank diff.	Significant?	Summary	Adjusted P Value
3.15	2.529	1.499		1	Col-0	1.96081		Col-0 vs. fer-4	-28.64	Yes	****	<0.0001	A-B
4.058	1.066	0.452		1	Col-0	2.05851		Col-0 vs. lrx345	-22.98	Yes	***	0.0004	A-C
0.491	1.625	0.396		1	fer-4	2.27286		fer-4 vs. lrx345	5.662	No	ns	>0.9999	B-C
5.285	0.606	0.35		1	fer-4	4.07381
2.713	1.054	1.117		1	fer-4	4.01636		Test details	Mean rank 1	Mean rank 2	Mean rank diff.	n1	n2	Z
2.662	0.678	0.975		1	fer-4	2.52543		Col-0 vs. fer-4	20.79	49.43	-28.64	24	21	4.397
1.274	0.346	1.813		1	fer-4	3.2732		Col-0 vs. lrx345	20.79	43.77	-22.98	24	30	3.849
4.632	0.531	0.315		1	fer-4	2.21279		fer-4 vs. lrx345	49.43	43.77	5.662	21	30	0.9131
3.995	3.396	0.498		1	fer-4	2.13997
1.622	0.797	0.656		1	fer-4	3.03049		Experiment 2
4.351	2.903	1.411		1	fer-4	3.23628		Number of families	1
				1	fer-4	3.50625		Number of comparisons per family	3
Fig2C				1	fer-4	3.91719		Alpha	0.05
elf18				1	fer-4	2.797
Col-0	fer-4	lrx3/4/5		1	fer-4	2.57103		Dunn's multiple comparisons test	Mean rank diff.	Significant?	Summary	Adjusted P Value
0.837	2.207	0.807		1	fer-4	3.80237		Col-0 vs. fer-4	-25.7	Yes	****	<0.0001	A-B
1.232	0.977	1.119		1	fer-4	4.72222		Col-0 vs. lrx345	-18	Yes	**	0.007	A-C
4.692	0.787	1.232		1	fer-4	6.55751		fer-4 vs. lrx345	7.696	No	ns	0.58	B-C
2.252	0.885	1.148		1	fer-4	4.68874
2.765	2.818	1.851		1	fer-4	3.02597		Test details	Mean rank 1	Mean rank 2	Mean rank diff.	n1	n2	Z
1.788	1.104	0.974		1	fer-4	3.62612		Col-0 vs. fer-4	20.43	46.13	-25.7	23	23	4.343
2.63	0.722	0.963		1	fer-4	2.95205		Col-0 vs. lrx345	20.43	38.43	-18	23	23	3.043
4.022	0.924	5.675		1	fer-4	2.72377		fer-4 vs. lrx345	46.13	38.43	7.696	23	23	1.301
3.313	1.069	1.457		1	lrx345	3.60291
3.993	1.529	4.233		1	lrx345	2.20691		Experiment 3
2.47	0.75	1.107		1	lrx345	3.78226		Number of families	1
1.845	0.817	1.472		1	lrx345	4.10452		Number of comparisons per family	3
2.429	1.062	1.333		1	lrx345	2.69437		Alpha	0.05
2.594	1.037	1.267		1	lrx345	2.57219
2.4	1.192	5.205		1	lrx345	2.8921		Dunn's multiple comparisons test	Mean rank diff.	Significant?	Summary	Adjusted P Value
2.476	0.916	1.699		1	lrx345	3.13618		Col-0 vs. fer-4	-33.93	Yes	****	<0.0001	A-B
5.124	0.887	4.301		1	lrx345	2.371		Col-0 vs. lrx345	-21.93	Yes	***	0.0005	A-C
9.183	1.323	2.007		1	lrx345	3.85832		fer-4 vs. lrx345	12	No	ns	0.2271	B-C
2.715	0.919	1.168		1	lrx345	3.23881
3.96	0.972	1.184		1	lrx345	3.10654		Test details	Mean rank 1	Mean rank 2	Mean rank diff.	n1	n2	Z
2.811	1.537	1.059		1	lrx345	2.97556		Col-0 vs. fer-4	23.23	57.17	-33.93	30	18	5.023
4.21	0.785	1.075		1	lrx345	4.13049		Col-0 vs. lrx345	23.23	45.17	-21.93	30	30	3.749
2.759	1.456	1.404		1	lrx345	4.44971		fer-4 vs. lrx345	57.17	45.17	12	18	30	1.776
4.515	0.64	1.788		1	lrx345	2.40801
				1	lrx345	2.31801
				1	lrx345	2.28175
				1	lrx345	2.50852
				1	lrx345	3.29759
				1	lrx345	2.03034
				1	lrx345	3.19709
				1	lrx345	3.4772
				1	lrx345	2.4846
				1	lrx345	3.25886
				1	lrx345	2.70421
				1	lrx345	3.45617
				1	lrx345	2.10722
				1	lrx345	2.95117
				1	lrx345	4.1706
				2	Col-0	2.57481
				2	Col-0	1.72408
				2	Col-0	2.33354
				2	Col-0	2.62895
				2	Col-0	2.09198
				2	Col-0	2.94371
				2	Col-0	2.367
				2	Col-0	2.34159
				2	Col-0	2.1724
				2	Col-0	2.08716
				2	Col-0	2.61494
				2	Col-0	1.99017
				2	Col-0	2.42057
				2	Col-0	2.31375
				2	Col-0	2.60206
				2	Col-0	2.19608
				2	Col-0	2.55419
				2	Col-0	2.11542
				2	Col-0	2.0364
				2	Col-0	2.60364
				2	Col-0	2.18006
				2	Col-0	2.51454
				2	Col-0	1.86393
				2	fer-4	2.37131
				2	fer-4	2.16883
				2	fer-4	3.39885
				2	fer-4	2.17631
				2	fer-4	2.34331
				2	fer-4	3.16167
				2	fer-4	3.55239
				2	fer-4	4.65024
				2	fer-4	2.76604
				2	fer-4	3.18127
				2	fer-4	3.1814
				2	fer-4	3.05316
				2	fer-4	6.20425
				2	fer-4	5.90639
				2	fer-4	6.22718
				2	fer-4	3.67107
				2	fer-4	4.2554
				2	fer-4	4.21062
				2	fer-4	3.94503
				2	fer-4	2.98088
				2	fer-4	2.8377
				2	fer-4	2.23193
				2	fer-4	2.59619
				2	lrx345	3.63802
				2	lrx345	4.18962
				2	lrx345	4.46938
				2	lrx345	3.80295
				2	lrx345	2.56921
				2	lrx345	2.27177
				2	lrx345	2.71522
				2	lrx345	2.94472
				2	lrx345	2.4148
				2	lrx345	2.72775
				2	lrx345	2.53163
				2	lrx345	4.51322
				2	lrx345	3.24896
				2	lrx345	3.5399
				2	lrx345	2.30881
				2	lrx345	2.22303
				2	lrx345	1.98969
				2	lrx345	2.42599
				2	lrx345	1.95088
				2	lrx345	2.33893
				2	lrx345	3.21269
				2	lrx345	3.12342
				2	lrx345	3.85297
				3	Col-0	1.93976
				3	Col-0	1.85264
				3	Col-0	1.75213
				3	Col-0	2.46351
				3	Col-0	1.98899
				3	Col-0	2.10528
				3	Col-0	2.46202
				3	Col-0	2.83185
				3	Col-0	2.63956
				3	Col-0	2.53979
				3	Col-0	2.90671
				3	Col-0	2.80522
				3	Col-0	2.4344
				3	Col-0	1.89497
				3	Col-0	1.91832
				3	Col-0	2.28455
				3	Col-0	2.28284
				3	Col-0	2.55896
				3	Col-0	2.54354
				3	Col-0	2.45636
				3	Col-0	3.48224
				3	Col-0	2.67115
				3	Col-0	3.05047
				3	Col-0	2.46466
				3	Col-0	3.65278
				3	Col-0	3.94216
				3	Col-0	3.67061
				3	Col-0	2.5075
				3	Col-0	3.84678
				3	Col-0	4.64162
				3	fer-4	4.23283
				3	fer-4	4.01414
				3	fer-4	4.51902
				3	fer-4	4.97923
				3	fer-4	3.69945
				3	fer-4	3.97886
				3	fer-4	4.07566
				3	fer-4	5.44931
				3	fer-4	4.79119
				3	fer-4	4.01632
				3	fer-4	4.39311
				3	fer-4	4.50554
				3	fer-4	3.9801
				3	fer-4	3.56256
				3	fer-4	3.61185
				3	fer-4	3.88669
				3	fer-4	3.563
				3	fer-4	4.52578
				3	lrx345	3.66813
				3	lrx345	2.39405
				3	lrx345	2.38685
				3	lrx345	2.33744
				3	lrx345	2.52527
				3	lrx345	2.17655
				3	lrx345	1.62456
				3	lrx345	2.8317
				3	lrx345	4.81945
				3	lrx345	3.82369
				3	lrx345	2.88401
				3	lrx345	5.18721
				3	lrx345	5.64754
				3	lrx345	4.54996
				3	lrx345	3.08302
				3	lrx345	2.8752
				3	lrx345	5.14556
				3	lrx345	4.57592
				3	lrx345	4.81531
				3	lrx345	4.68882
				3	lrx345	3.53932
				3	lrx345	3.06041
				3	lrx345	3.93189
				3	lrx345	4.11339
				3	lrx345	3.42705
				3	lrx345	4.63269
				3	lrx345	3.42809
				3	lrx345	3.96093
				3	lrx345	6.07286
				3	lrx345	3.6903
