# Supplementary material for: Regulation of immune receptor kinase plasma membrane nanoscale organization by a plant peptide hormone and its receptors
Source: eLife journal article supplement (doi:10.7554/elife.74162), 2022-01-06
Supplement: supp [file elife-74162-supp-v1.zip › elife_poa_e74162_Figure_3_figure_supplement_1_source_data_1.xlsx]

## Sheet: Sheet1
Figure 3 supplement figure 1B
flg22
Col-0	fer-4	LRX4dE-FLAG
11.063	4.586	6.917
10.154	1.829	0.829
5.916	0.395	10.116
3.492	0.784	2.069
8.235	2.924	7.532
8.709	1.272	11.023
10.315	2.323	8.804
9.357	3.726	9.518
9.333	3.131	4.825
9.379	3.07	1.73
6.715	3.583	7.461
8.032	3.286	11.715
7.811	3.299	10.113
7.167	3.615	8.872
12.252	3.111	10.479
8.19	7.581	8.408
Figure 3 supplement figure 1C
elf18
Col-0	fer-4	LRX4dE-FLAG
5.475	2.209	4.4
5.387	0.851	4.398
5.317	0.425	1.022
2.955	0.406	3.773
5.26	0.699	3.929
5.328	0.571	4.6
4.886	1.892	3.826
2.979	0.598	2.464
3.376	0.252	2.382
1.206	1.115	0.279
2.149	0.286	3.497
1.352	0.602	5.685
6.364	3.29	2.987
2.074	0.642	2.075
1.272	0.579	3.095
1.456	0.443	2.308
Figure 3 supplement figure 1D
flg22
Col-0 100nM	Col-0 300nM	Col-0 1uM	fer-4 100nM	fer-4 300nM	fer-4 1uM	lrx345 100nM	lrx345 300nM	lrx345 1uM	LRR4-citrine #2 100nM	LRR4-citrine #2 300nM	LRR4-citrine #2 1uM	LRR4-citrine #4 100nM	LRR4-citrine #4 300nM	LRR4-citrine #4 1uM
59.6634	41.5823	44.9698	118.65	93.9348	104.549	85.7074	83.8929	66.2284	66.8125	65.9461	45.5365	69.8976	59.9123	46.9615
58.5624	49.7124	29.9375	102.502	98.3321	98.9386	80.3173	61.0518	77.7023	71.8187	58.1962	54.1047	75.2232	54.5867	60.4569
56.7839	58.9012	45.6897	114.253	122.441	98.4079	73.9133	79.5168	66.3885	61.6139	67.9678	40.1453	73.4076	45.9327	46.5984
57.2921	40.2272	43.9536	131.236	88.7036	70.887	72.4724	65.7481	84.3732	66.0424	59.881	44.7663	48.5955	53.0738	41.3334
63.1356	46.706	46.1131	117.134	86.7324	105.08	76.5282	88.9094	79.8904	63.5393	61.4695	49.628	59.2466	62.7566	40.5467
60.2562	39.4227	44.4617	121.456	94.6929	98.1804	88.856	76.5816	80.9577	63.443	63.2024	54.1047	60.2754	52.5291	43.9962
55.4713	50.4323	41.4976	117.134	99.8484	86.7324	92.8052	75.1407	78.9297	65.7535	53.8159	50.5426	47.1431	45.3276	38.7311
57.6308	38.5335	51.7873	135.633	103.715	92.1911	85.8141	69.8574	67.9361	63.9244	56.9928	49.8687	50.29	41.1519	36.5525
58.266	47.9339	41.921	124.109	98.7111	89.9166	90.6171	86.3478	81.8116	66.283	64.2132	50.2057	64.6326	56.3417	31.1665
54.3703	45.5626	44.9275	102.426	98.1804	74.2229	95.9005	75.621	82.3986		57.3779	58.1962	53.4369		37.9444
70.2918	41.3706	39.465			84.3821	78.1826	73.1128			59.4477	50.7352			33.5872
	46.5789					85.9208				66.283	58.3406
Figure 3 supplement figure 1E
RALF23
Col-0	lrx3/4/5	LRX4dE-FLAG
0.444541	0.758621	0.525974
0.265165	1.05747	0.394481
0.608319	0.781609	0.328734
0.514731	0.528736	0.423701
0.530329	0.701149	0.306818
0.428943	0.850575	0.314123
0.514731	0.356322	0.511364
0.358752	0.781609	0.36526
	0.793103	0.518669
		0.555195
