# Supplementary material for: Regulation of immune receptor kinase plasma membrane nanoscale organization by a plant peptide hormone and its receptors
Source: eLife journal article supplement (doi:10.7554/elife.74162), 2022-01-06
Supplement: supp [file elife-74162-supp-v1.zip › elife_poa_e74162_Figure_3_source_data_1.xlsx]

## Sheet: Sheet1
Fig3F
flg22
Col-0	fer-4	fer-4/WT	fer-4/dmalA
2.7963	2.1714	3.0222	2.0439
2.7633	0.2348	2.1321	2.3362
4.1842	1.0327	3.6161	3.1168
3.2033	1.7595	2.383	2.6035
3.4882	0.2477	3.0365	2.3971
2.9261	2.4257	2.0554	2.2923
1.5731	2.3189	2.4913	2.1398
2.5904	0.2369	2.772	3.0255
Fig3G
elf18
Col-0	fer-4	fer-4/WT	fer-4/dmalA
3.0943	0.1389	3.4037	3.557
3.3187	0.7263	2.5367	3.4213
3.0869	0.2225	2.5372	2.8013
2.0746	0.3734	3.4933	2.177
2.3883	0.9034	2.5273	1.6275
3.3021	0.3904	1.7347	2.312
2.63	1.2798	2.0259	0.9195
2.7909	1.3883	1.8726	2.27
Fig3H
RALF23
Col-0	fer-4	fer-4/dmalA
0.590064	1.08826	0.689309
0.726608	0.848583	0.645544
0.570558	1.08826	0.437657
0.199939	1.46397	0.375655
0.526669	0.757895	0.667427
0.882658	1.2502	0.565307
0.897287	1.017	0.641896
0.672966	0.868016	0.711192
0.555928	0.91336	0.714839
0.555928	0.680162	0.685662
0.672966	0.667207	0.38295
0.907041	0.492308	0.849784
0.497409	0.906883	0.415774
0.395002	0.900405	0.835195
0.599817	1.14008	0.616367
1.21914	0.680162	0.751311
