# Supplementary material for: Regulation of immune receptor kinase plasma membrane nanoscale organization by a plant peptide hormone and its receptors
Source: eLife journal article supplement (doi:10.7554/elife.74162), 2022-01-06
Supplement: supp [file elife-74162-supp-v1.zip › elife_poa_e74162_Figure_4_figure_supplement_1_source_data_1.xlsx]

## Sheet: Sheet1
Figure 4 supplement figure 1B
flg22 100nM
Col-0	fer-4	fer-4/pFER::FER-GFP WT	fer-4/pFER::FER-GFP KD
9.805	1.695	1.439	2.593
9.132	2.48	6.407	7.237
7.718	2.998	9.491	7.069
8.778	2.986	7.439	4.045
5.026	1.828	7.455	8.045
10.255	1.305	9.456	7.14
5.232	1.909	3.936	4.577
5.454	1.14	4.953	5.884
1.597	4.133	11.248	5.843
2.848	1.072	1.821	3.874
4.945	1.38	6.585	3.14
2.064	1.953	7.66	3.765
4.457	1.794	4.102	3.474
3.711	0.909	4.88	6.633
3.69	1.445	6.598	4.756
4.133	1.198	5.471	10.313
Figure 4 supplement figure 1C
elf18 100nM
Col-0	fer-4	fer-4/pFER::FER-GFP WT	fer-4/pFER::FER-GFP KD
4.2301	1.461	4.4202	5.488
4.8055	1.1024	2.734	4.1373
2.3176	0.7664	2.7795	4.6535
2.0145	1.1905	6.8523	5.438
5.9219	1.6865	4.1576	5.8555
5.2192	0.9396	5.0957	7.2977
6.2492	0.9834	6.5332	5.7108
5.7207	4.8457	2.8132	7.1136
4.5549	2.1014	2.9967	4.2379
5.9238	0.5951	4.2142	7.7307
5.9802	0.3587	5.1748	6.9883
3.2391	3.1259	6.4304	5.8188
7.084	3.8467	6.7905	6.2577
5.679	0.8625	8.0076	5.2953
6.1477	0.3888	7.8949	5.4973
6.1972	7.3563	6.3893	5.4452
