# Supplementary material for: Regulation of immune receptor kinase plasma membrane nanoscale organization by a plant peptide hormone and its receptors
Source: eLife journal article supplement (doi:10.7554/elife.74162), 2022-01-06
Supplement: supp [file elife-74162-supp-v1.zip › elife_poa_e74162_Figure_4_figure_supplement_2_source_data_1.xlsx]

## Sheet: Sheet1
Figure 4 supplement figure 2C
fer-4/pFER::FER-GFP WT		fer-4/pFER::FER-GFP KD
elf18	elf18+RALF23	elf18	elf18+RALF23
0.963	1.348	1.538	1.0615
1.521	1.48125	1.9125	0.904
2.08775	0.9705	1.8951	2.56525
3.9365	1.00125	1.991	2.028
1.78675	0.73475	1.06	1.6945
1.81425	0.91875	1.0935	1.30275
0.9325	1.05742	2.2355	1.37675
1.6945	1.288	1.515	1.24025
2.29375	1.11125	2.0735	1.31175
1.59925	0.8855	2.05375	1.1835
1.3165	0.95025	1.651	1.22275
1.111	1.02575	1.823	3.02975
