# Supplementary material for: Regulation of immune receptor kinase plasma membrane nanoscale organization by a plant peptide hormone and its receptors
Source: eLife journal article supplement (doi:10.7554/elife.74162), 2022-01-06
Supplement: supp [file elife-74162-supp-v1.zip › elife_poa_e74162_Figure_4_figure_supplement_3_source_data_1.xlsx]

## Sheet: Sheet1
Replicate	Genotype	Values
1	Col-0_Mock	-2.13918		Experiment 1+2+3
1	Col-0_Mock	-2.18776		Number of families	1
1	Col-0_Mock	-2.18916		Number of comparisons per family	6
1	Col-0_Mock	-2.08788		Alpha	0.05
1	Col-0_Mock	-2.17607
1	Col-0_Mock	-2.17421		Dunn's multiple comparisons test	Mean rank diff.	Significant?	Summary	Adjusted P Value
1	Col-0_Mock	-2.10347		Col-0 + Mock vs. Col-0 + R23	114.7	Yes	****	<0.0001	A-B
1	Col-0_R23	-2.01633		Col-0 + Mock vs. fer-2 + Mock	78.77	Yes	****	<0.0001	A-C
1	Col-0_R23	-2.01309		Col-0 + Mock vs. fer-2 + R23	56.74	Yes	**	0.001	A-D
1	Col-0_R23	-2.10802		Col-0 + R23 vs. fer-2 + Mock	-35.95	Yes	*	0.0497	B-C
1	Col-0_R23	-2.07417		Col-0 + R23 vs. fer-2 + R23	-57.99	Yes	***	0.0004	B-D
1	Col-0_R23	-2.07988		fer-2 + Mock vs. fer-2 + R23	-22.04	No	ns	0.8008	C-D
1	Col-0_R23	-2.03161
1	Col-0_R23	-2.09066		Test details	Mean rank 1	Mean rank 2	Mean rank diff.	n1	n2	Z
1	Col-0_R23	-2.01421		Col-0 + Mock vs. Col-0 + R23	218.7	104	114.7	72	87	8.165
1	Col-0_R23	-2.049		Col-0 + Mock vs. fer-2 + Mock	218.7	140	78.77	72	81	5.515
1	Col-0_R23	-2.06666		Col-0 + Mock vs. fer-2 + R23	218.7	162	56.74	72	65	3.76
1	fer-2_Mock	-1.98247		Col-0 + R23 vs. fer-2 + Mock	104	140	-35.95	87	81	2.64
1	fer-2_Mock	-2.05355		Col-0 + R23 vs. fer-2 + R23	104	162	-57.99	87	65	4.011
1	fer-2_Mock	-2.04998		fer-2 + Mock vs. fer-2 + R23	140	162	-22.04	81	65	1.501
1	fer-2_Mock	-1.96883
1	fer-2_Mock	-1.91024		Experiment 1
1	fer-2_Mock	-1.9546		Number of families	1
1	fer-2_Mock	-2.026		Number of comparisons per family	6
1	fer-2_Mock	-2.06424		Alpha	0.05
1	fer-2_Mock	-2.09496
1	fer-2_R23	-2.07191		Dunn's multiple comparisons test	Mean rank diff.	Significant?	Summary	Adjusted P Value
1	fer-2_R23	-2.07191		Col-0 + Mock vs. Col-0 + R23	43.62	Yes	****	<0.0001	A-B
1	fer-2_R23	-1.99004		Col-0 + Mock vs. fer-2 + Mock	23.31	Yes	*	0.0397	A-C
1	fer-2_R23	-1.96102		Col-0 + Mock vs. fer-2 + R23	3.402	No	ns	>0.9999	A-D
1	fer-2_R23	-2.01453		Col-0 + R23 vs. fer-2 + Mock	-20.31	No	ns	0.0702	B-C
1	fer-2_R23	-2.09162		Col-0 + R23 vs. fer-2 + R23	-40.22	Yes	****	<0.0001	B-D
2	Col-0_Mock	-2.06258		fer-2 + Mock vs. fer-2 + R23	-19.91	No	ns	0.0809	C-D
2	Col-0_Mock	-2.04475
2	Col-0_Mock	-2.11827		Test details	Mean rank 1	Mean rank 2	Mean rank diff.	n1	n2	Z
2	Col-0_Mock	-2.37469		Col-0 + Mock vs. Col-0 + R23	68.48	24.85	43.62	21	27	5.22
2	Col-0_Mock	-2.2636		Col-0 + Mock vs. fer-2 + Mock	68.48	45.17	23.31	21	24	2.716
2	Col-0_Mock	-2.13006		Col-0 + Mock vs. fer-2 + R23	68.48	65.07	3.402	21	27	0.4071
2	Col-0_Mock	-2.17993		Col-0 + R23 vs. fer-2 + Mock	24.85	45.17	-20.31	27	24	2.521
2	Col-0_R23	-2.11419		Col-0 + R23 vs. fer-2 + R23	24.85	65.07	-40.22	27	27	5.145
2	Col-0_R23	-2.0297		fer-2 + Mock vs. fer-2 + R23	45.17	65.07	-19.91	24	27	2.471
2	Col-0_R23	-1.96613
2	Col-0_R23	-2.08218		Experiment 2
2	Col-0_R23	-1.93614		Number of families	1
2	Col-0_R23	-2.10947		Number of comparisons per family	6
2	Col-0_R23	-2.1893		Alpha	0.05
2	Col-0_R23	-2.12159
2	fer-2_Mock	-2.0935		Dunn's multiple comparisons test	Mean rank diff.	Significant?	Summary	Adjusted P Value
2	fer-2_Mock	-2.09969		Col-0 + Mock vs. Col-0 + R23	38.42	Yes	****	<0.0001	A-B
2	fer-2_Mock	-1.96126		Col-0 + Mock vs. fer-2 + Mock	25.26	Yes	*	0.0118	A-C
2	fer-2_Mock	-1.89722		Col-0 + Mock vs. fer-2 + R23	11.96	No	ns	>0.9999	A-D
2	fer-2_Mock	-1.99426		Col-0 + R23 vs. fer-2 + Mock	-13.16	No	ns	0.4886	B-C
2	fer-2_Mock	-1.9818		Col-0 + R23 vs. fer-2 + R23	-26.46	Yes	*	0.0277	B-D
2	fer-2_Mock	-1.98758		fer-2 + Mock vs. fer-2 + R23	-13.3	No	ns	0.7755	C-D
2	fer-2_Mock	-2.05448
2	fer-2_R23	-2.09615		Test details	Mean rank 1	Mean rank 2	Mean rank diff.	n1	n2	Z
2	fer-2_R23	-2.09751		Col-0 + Mock vs. Col-0 + R23	73.9	35.48	38.42	21	27	4.378
2	fer-2_R23	-2.1093		Col-0 + Mock vs. fer-2 + Mock	73.9	48.64	25.26	21	39	3.094
2	fer-2_R23	-2.0205		Col-0 + Mock vs. fer-2 + R23	73.9	61.94	11.96	21	17	1.216
2	fer-2_R23	-1.99926		Col-0 + R23 vs. fer-2 + Mock	35.48	48.64	-13.16	27	39	1.742
2	fer-2_R23	-2.02581		Col-0 + R23 vs. fer-2 + R23	35.48	61.94	-26.46	27	17	2.833
2	fer-2_R23	-2.03598		fer-2 + Mock vs. fer-2 + R23	48.64	61.94	-13.3	39	17	1.517
2	fer-2_R23	-2.06459
2	fer-2_R23	-2.05046		Experiment 3
3	Col-0_Mock	-2.21358		Number of families	1
3	Col-0_Mock	-2.00188		Number of comparisons per family	6
3	Col-0_Mock	-1.94471		Alpha	0.05
3	Col-0_Mock	-2.23476
3	Col-0_Mock	-2.02255		Dunn's multiple comparisons test	Mean rank diff.	Significant?	Summary	Adjusted P Value
3	Col-0_Mock	-2.21845		Col-0 + Mock vs. Col-0 + R23	32.82	Yes	****	<0.0001	A-B
3	Col-0_Mock	-2.04934		Col-0 + Mock vs. fer-2 + Mock	26.87	Yes	*	0.0139	A-C
3	Col-0_Mock	-2.18345		Col-0 + Mock vs. fer-2 + R23	36.46	Yes	****	<0.0001	A-D
3	Col-0_Mock	-2.14439		Col-0 + R23 vs. fer-2 + Mock	-5.955	No	ns	>0.9999	B-C
3	Col-0_Mock	-2.14439		Col-0 + R23 vs. fer-2 + R23	3.641	No	ns	>0.9999	B-D
3	Col-0_Mock	-2.2225		fer-2 + Mock vs. fer-2 + R23	9.595	No	ns	>0.9999	C-D
3	Col-0_Mock	-2.0909
3	Col-0_Mock	-2.1553		Test details	Mean rank 1	Mean rank 2	Mean rank diff.	n1	n2	Z
3	Col-0_Mock	-2.01607		Col-0 + Mock vs. Col-0 + R23	74.37	41.55	32.82	30	33	4.397
3	Col-0_Mock	-2.10344		Col-0 + Mock vs. fer-2 + Mock	74.37	47.5	26.87	30	18	3.046
3	Col-0_R23	-1.8523		Col-0 + Mock vs. fer-2 + R23	74.37	37.9	36.46	30	21	4.331
3	Col-0_R23	-1.86149		Col-0 + R23 vs. fer-2 + Mock	41.55	47.5	-5.955	33	18	0.6868
3	Col-0_R23	-2.04731		Col-0 + R23 vs. fer-2 + R23	41.55	37.9	3.641	33	21	0.4408
3	Col-0_R23	-1.90962		fer-2 + Mock vs. fer-2 + R23	47.5	37.9	9.595	18	21	1.01
3	Col-0_R23	-1.85896
3	Col-0_R23	-1.85896
3	Col-0_R23	-1.92555
3	Col-0_R23	-2.01861
3	Col-0_R23	-1.94367
3	fer-2_Mock	-1.80146
3	fer-2_Mock	-1.88302
3	fer-2_Mock	-1.87899
3	fer-2_Mock	-1.87535
3	fer-2_Mock	-2.00176
3	fer-2_Mock	-2.00119
3	fer-2_Mock	-2.08848
3	fer-2_Mock	-1.8704
3	fer-2_Mock	-2.05499
3	fer-2_Mock	-1.88768
3	fer-2_Mock	-1.80127
3	fer-2_R23	-1.8093
3	fer-2_R23	-1.82095
3	fer-2_R23	-1.95137
3	fer-2_R23	-1.90335
3	fer-2_R23	-1.73575
3	fer-2_R23	-2.02664
3	fer-2_R23	-2.14261
3	fer-2_R23	-1.96573
3	fer-2_R23	-2.10266
3	fer-2_R23	-2.0262
