# Supplementary material for: Regulation of immune receptor kinase plasma membrane nanoscale organization by a plant peptide hormone and its receptors
Source: eLife journal article supplement (doi:10.7554/elife.74162), 2022-01-06
Supplement: supp [file elife-74162-supp-v1.zip › elife_poa_e74162_Figure_4_figure_supplement_4_source_data_1.xlsx]

## Sheet: Sheet1
Replicate	Genotype	Values
1	Col-0_Mock	3.33501		Experiment 1+2+3
1	Col-0_Mock	3.26678		Number of families	1
1	Col-0_Mock	2.65056		Number of comparisons per family	6
1	Col-0_Mock	3.5966		Alpha	0.05
1	Col-0_Mock	3.52405
1	Col-0_Mock	3.33415		Dunn's multiple comparisons test	Mean rank diff.	Significant?	Summary	Adjusted P Value
1	Col-0_Mock	1.97199		Col-0 + Mock vs. Col-0 + R23	114.7	Yes	****	<0.0001	A-B
1	Col-0_Mock	2.06786		Col-0 + Mock vs. fer-2 + Mock	78.77	Yes	****	<0.0001	A-C
1	Col-0_Mock	1.96296		Col-0 + Mock vs. fer-2 + R23	56.74	Yes	**	0.001	A-D
1	Col-0_Mock	3.33868		Col-0 + R23 vs. fer-2 + Mock	-35.95	Yes	*	0.0497	B-C
1	Col-0_Mock	3.66439		Col-0 + R23 vs. fer-2 + R23	-57.99	Yes	***	0.0004	B-D
1	Col-0_Mock	2.43822		fer-2 + Mock vs. fer-2 + R23	-22.04	No	ns	0.8008	C-D
1	Col-0_Mock	2.2225
1	Col-0_Mock	3.38594		Test details	Mean rank 1	Mean rank 2	Mean rank diff.	n1	n2	Z
1	Col-0_Mock	2.58249		Col-0 + Mock vs. Col-0 + R23	218.7	104	114.7	72	87	8.165
1	Col-0_Mock	2.75174		Col-0 + Mock vs. fer-2 + Mock	218.7	140	78.77	72	81	5.515
1	Col-0_Mock	3.04302		Col-0 + Mock vs. fer-2 + R23	218.7	162	56.74	72	65	3.76
1	Col-0_Mock	2.49058		Col-0 + R23 vs. fer-2 + Mock	104	140	-35.95	87	81	2.64
1	Col-0_Mock	2.77747		Col-0 + R23 vs. fer-2 + R23	104	162	-57.99	87	65	4.011
1	Col-0_Mock	2.08832		fer-2 + Mock vs. fer-2 + R23	140	162	-22.04	81	65	1.501
1	Col-0_Mock	3.52304
1	Col-0_R23	1.87824		Experiment 1
1	Col-0_R23	2.16902		Number of families	1
1	Col-0_R23	1.7895		Number of comparisons per family	6
1	Col-0_R23	1.95821		Alpha	0.05
1	Col-0_R23	2.08138
1	Col-0_R23	2.25736		Dunn's multiple comparisons test	Mean rank diff.	Significant?	Summary	Adjusted P Value
1	Col-0_R23	1.98055		Col-0 + Mock vs. Col-0 + R23	43.62	Yes	****	<0.0001	A-B
1	Col-0_R23	1.92696		Col-0 + Mock vs. fer-2 + Mock	23.31	Yes	*	0.0397	A-C
1	Col-0_R23	2.45465		Col-0 + Mock vs. fer-2 + R23	3.402	No	ns	>0.9999	A-D
1	Col-0_R23	2.38855		Col-0 + R23 vs. fer-2 + Mock	-20.31	No	ns	0.0702	B-C
1	Col-0_R23	1.99253		Col-0 + R23 vs. fer-2 + R23	-40.22	Yes	****	<0.0001	B-D
1	Col-0_R23	2.37227		fer-2 + Mock vs. fer-2 + R23	-19.91	No	ns	0.0809	C-D
1	Col-0_R23	3.31316
1	Col-0_R23	2.77054		Test details	Mean rank 1	Mean rank 2	Mean rank diff.	n1	n2	Z
1	Col-0_R23	1.90176		Col-0 + Mock vs. Col-0 + R23	68.48	24.85	43.62	21	27	5.22
1	Col-0_R23	1.83741		Col-0 + Mock vs. fer-2 + Mock	68.48	45.17	23.31	21	24	2.716
1	Col-0_R23	2.02449		Col-0 + Mock vs. fer-2 + R23	68.48	65.07	3.402	21	27	0.4071
1	Col-0_R23	2.04036		Col-0 + R23 vs. fer-2 + Mock	24.85	45.17	-20.31	27	24	2.521
1	Col-0_R23	1.97979		Col-0 + R23 vs. fer-2 + R23	24.85	65.07	-40.22	27	27	5.145
1	Col-0_R23	1.84091		fer-2 + Mock vs. fer-2 + R23	45.17	65.07	-19.91	24	27	2.471
1	Col-0_R23	1.62631
1	Col-0_R23	1.92501		Experiment 2
1	Col-0_R23	2.11408		Number of families	1
1	Col-0_R23	1.93873		Number of comparisons per family	6
1	Col-0_R23	2.14542		Alpha	0.05
1	Col-0_R23	2.34872
1	Col-0_R23	1.86032		Dunn's multiple comparisons test	Mean rank diff.	Significant?	Summary	Adjusted P Value
1	fer-2_Mock	2.8515		Col-0 + Mock vs. Col-0 + R23	38.42	Yes	****	<0.0001	A-B
1	fer-2_Mock	2.456		Col-0 + Mock vs. fer-2 + Mock	25.26	Yes	*	0.0118	A-C
1	fer-2_Mock	2.30554		Col-0 + Mock vs. fer-2 + R23	11.96	No	ns	>0.9999	A-D
1	fer-2_Mock	2.13697		Col-0 + R23 vs. fer-2 + Mock	-13.16	No	ns	0.4886	B-C
1	fer-2_Mock	2.66953		Col-0 + R23 vs. fer-2 + R23	-26.46	Yes	*	0.0277	B-D
1	fer-2_Mock	2.75362		fer-2 + Mock vs. fer-2 + R23	-13.3	No	ns	0.7755	C-D
1	fer-2_Mock	2.29277
1	fer-2_Mock	3.11676		Test details	Mean rank 1	Mean rank 2	Mean rank diff.	n1	n2	Z
1	fer-2_Mock	2.49674		Col-0 + Mock vs. Col-0 + R23	73.9	35.48	38.42	21	27	4.378
1	fer-2_Mock	2.15078		Col-0 + Mock vs. fer-2 + Mock	73.9	48.64	25.26	21	39	3.094
1	fer-2_Mock	1.85251		Col-0 + Mock vs. fer-2 + R23	73.9	61.94	11.96	21	17	1.216
1	fer-2_Mock	2.21211		Col-0 + R23 vs. fer-2 + Mock	35.48	48.64	-13.16	27	39	1.742
1	fer-2_Mock	2.38072		Col-0 + R23 vs. fer-2 + R23	35.48	61.94	-26.46	27	17	2.833
1	fer-2_Mock	1.97209		fer-2 + Mock vs. fer-2 + R23	48.64	61.94	-13.3	39	17	1.517
1	fer-2_Mock	2.60451
1	fer-2_Mock	2.1725		Experiment 3
1	fer-2_Mock	1.95443		Number of families	1
1	fer-2_Mock	2.53976		Number of comparisons per family	6
1	fer-2_Mock	2.5366		Alpha	0.05
1	fer-2_Mock	2.31695
1	fer-2_Mock	2.33931		Dunn's multiple comparisons test	Mean rank diff.	Significant?	Summary	Adjusted P Value
1	fer-2_Mock	2.33855		Col-0 + Mock vs. Col-0 + R23	32.82	Yes	****	<0.0001	A-B
1	fer-2_Mock	2.08398		Col-0 + Mock vs. fer-2 + Mock	26.87	Yes	*	0.0139	A-C
1	fer-2_Mock	2.40337		Col-0 + Mock vs. fer-2 + R23	36.46	Yes	****	<0.0001	A-D
1	fer-2_R23	2.42573		Col-0 + R23 vs. fer-2 + Mock	-5.955	No	ns	>0.9999	B-C
1	fer-2_R23	2.15116		Col-0 + R23 vs. fer-2 + R23	3.641	No	ns	>0.9999	B-D
1	fer-2_R23	2.34197		fer-2 + Mock vs. fer-2 + R23	9.595	No	ns	>0.9999	C-D
1	fer-2_R23	2.55696
1	fer-2_R23	2.93132		Test details	Mean rank 1	Mean rank 2	Mean rank diff.	n1	n2	Z
1	fer-2_R23	2.62884		Col-0 + Mock vs. Col-0 + R23	74.37	41.55	32.82	30	33	4.397
1	fer-2_R23	2.87329		Col-0 + Mock vs. fer-2 + Mock	74.37	47.5	26.87	30	18	3.046
1	fer-2_R23	2.47277		Col-0 + Mock vs. fer-2 + R23	74.37	37.9	36.46	30	21	4.331
1	fer-2_R23	2.09621		Col-0 + R23 vs. fer-2 + Mock	41.55	47.5	-5.955	33	18	0.6868
1	fer-2_R23	2.61873		Col-0 + R23 vs. fer-2 + R23	41.55	37.9	3.641	33	21	0.4408
1	fer-2_R23	3.20947		fer-2 + Mock vs. fer-2 + R23	47.5	37.9	9.595	18	21	1.01
1	fer-2_R23	2.98722
1	fer-2_R23	2.54613
1	fer-2_R23	2.73954
1	fer-2_R23	2.59221
1	fer-2_R23	2.27801
1	fer-2_R23	2.52116
1	fer-2_R23	2.57407
1	fer-2_R23	2.57487
1	fer-2_R23	2.4299
1	fer-2_R23	2.88142
1	fer-2_R23	3.41199
1	fer-2_R23	2.75811
1	fer-2_R23	2.65703
1	fer-2_R23	3.24539
1	fer-2_R23	2.85559
1	fer-2_R23	2.49377
2	Col-0_Mock	2.97955
2	Col-0_Mock	2.80251
2	Col-0_Mock	3.08566
2	Col-0_Mock	2.54669
2	Col-0_Mock	2.45697
2	Col-0_Mock	2.45713
2	Col-0_Mock	3.29385
2	Col-0_Mock	3.83468
2	Col-0_Mock	3.76218
2	Col-0_Mock	2.55814
2	Col-0_Mock	2.47421
2	Col-0_Mock	2.30496
2	Col-0_Mock	2.58034
2	Col-0_Mock	3.00644
2	Col-0_Mock	2.80532
2	Col-0_Mock	2.97476
2	Col-0_Mock	2.0923
2	Col-0_Mock	2.76977
2	Col-0_Mock	3.39178
2	Col-0_Mock	4.09607
2	Col-0_Mock	2.51715
2	Col-0_R23	2.26851
2	Col-0_R23	2.35993
2	Col-0_R23	2.6474
2	Col-0_R23	2.41998
2	Col-0_R23	2.00612
2	Col-0_R23	2.12457
2	Col-0_R23	2.01492
2	Col-0_R23	2.08594
2	Col-0_R23	2.05016
2	Col-0_R23	2.02642
2	Col-0_R23	2.78193
2	Col-0_R23	2.43047
2	Col-0_R23	2.18982
2	Col-0_R23	2.02929
2	Col-0_R23	2.4307
2	Col-0_R23	1.8462
2	Col-0_R23	1.72255
2	Col-0_R23	2.2048
2	Col-0_R23	2.82998
2	Col-0_R23	1.716
2	Col-0_R23	2.30095
2	Col-0_R23	3.52281
2	Col-0_R23	3.04426
2	Col-0_R23	2.60397
2	Col-0_R23	2.31679
2	Col-0_R23	2.37442
2	Col-0_R23	2.19125
2	fer-2_Mock	3.18969
2	fer-2_Mock	2.72853
2	fer-2_Mock	2.4832
2	fer-2_Mock	2.34221
2	fer-2_Mock	3.18619
2	fer-2_Mock	3.25481
2	fer-2_Mock	2.15474
2	fer-2_Mock	2.15525
2	fer-2_Mock	2.41003
2	fer-2_Mock	2.27773
2	fer-2_Mock	2.51998
2	fer-2_Mock	2.36091
2	fer-2_Mock	2.42902
2	fer-2_Mock	2.56468
2	fer-2_Mock	2.27426
2	fer-2_Mock	2.35666
2	fer-2_Mock	2.62156
2	fer-2_Mock	2.45917
2	fer-2_Mock	2.8708
2	fer-2_Mock	2.60957
2	fer-2_Mock	2.71867
2	fer-2_Mock	2.68177
2	fer-2_Mock	2.37662
2	fer-2_Mock	2.242
2	fer-2_Mock	2.23384
2	fer-2_Mock	2.22501
2	fer-2_Mock	2.15618
2	fer-2_Mock	2.49308
2	fer-2_Mock	2.13996
2	fer-2_Mock	2.36061
2	fer-2_Mock	2.69525
2	fer-2_Mock	2.74282
2	fer-2_Mock	3.1109
2	fer-2_Mock	2.27248
2	fer-2_Mock	2.22288
2	fer-2_Mock	2.55562
2	fer-2_Mock	1.61343
2	fer-2_Mock	1.64403
2	fer-2_Mock	2.08638
2	fer-2_R23	3.13164
2	fer-2_R23	2.92503
2	fer-2_R23	2.75948
2	fer-2_R23	2.32141
2	fer-2_R23	2.66034
2	fer-2_R23	2.45969
2	fer-2_R23	2.35005
2	fer-2_R23	3.05583
2	fer-2_R23	2.01774
2	fer-2_R23	3.11984
2	fer-2_R23	2.30456
2	fer-2_R23	2.41076
2	fer-2_R23	2.53397
2	fer-2_R23	2.80549
2	fer-2_R23	2.78675
2	fer-2_R23	3.05582
2	fer-2_R23	2.13405
3	Col-0_Mock	2.83698
3	Col-0_Mock	3.36033
3	Col-0_Mock	2.69162
3	Col-0_Mock	2.30286
3	Col-0_Mock	3.67533
3	Col-0_Mock	2.4515
3	Col-0_Mock	3.14017
3	Col-0_Mock	3.60011
3	Col-0_Mock	2.74965
3	Col-0_Mock	2.97486
3	Col-0_Mock	4.46101
3	Col-0_Mock	3.02051
3	Col-0_Mock	2.39419
3	Col-0_Mock	2.58468
3	Col-0_Mock	2.78996
3	Col-0_Mock	2.72501
3	Col-0_Mock	2.887
3	Col-0_Mock	2.74359
3	Col-0_Mock	2.82278
3	Col-0_Mock	2.98828
3	Col-0_Mock	2.74783
3	Col-0_Mock	4.05318
3	Col-0_Mock	4.89025
3	Col-0_Mock	2.50013
3	Col-0_Mock	2.58334
3	Col-0_Mock	3.55642
3	Col-0_Mock	3.92175
3	Col-0_Mock	3.28714
3	Col-0_Mock	2.56117
3	Col-0_Mock	2.58595
3	Col-0_R23	2.02425
3	Col-0_R23	2.00661
3	Col-0_R23	1.73024
3	Col-0_R23	1.84731
3	Col-0_R23	1.587
3	Col-0_R23	2.06803
3	Col-0_R23	1.55698
3	Col-0_R23	1.76171
3	Col-0_R23	1.88515
3	Col-0_R23	2.28841
3	Col-0_R23	2.64076
3	Col-0_R23	2.38745
3	Col-0_R23	1.87659
3	Col-0_R23	2.11367
3	Col-0_R23	1.91704
3	Col-0_R23	2.64081
3	Col-0_R23	1.90888
3	Col-0_R23	1.70299
3	Col-0_R23	2.61975
3	Col-0_R23	2.63452
3	Col-0_R23	2.05793
3	Col-0_R23	2.84583
3	Col-0_R23	2.72563
3	Col-0_R23	2.83913
3	Col-0_R23	2.26459
3	Col-0_R23	2.86668
3	Col-0_R23	2.70821
3	Col-0_R23	2.06894
3	Col-0_R23	2.4419
3	Col-0_R23	3.03234
3	Col-0_R23	2.73675
3	Col-0_R23	3.00107
3	Col-0_R23	2.89511
3	fer-2_Mock	2.77876
3	fer-2_Mock	2.06173
3	fer-2_Mock	2.16341
3	fer-2_Mock	1.91322
3	fer-2_Mock	2.16454
3	fer-2_Mock	1.82224
3	fer-2_Mock	2.18474
3	fer-2_Mock	2.29803
3	fer-2_Mock	2.16426
3	fer-2_Mock	1.84705
3	fer-2_Mock	2.01194
3	fer-2_Mock	2.48263
3	fer-2_Mock	3.05506
3	fer-2_Mock	2.5426
3	fer-2_Mock	2.41436
3	fer-2_Mock	2.99441
3	fer-2_Mock	4.11879
3	fer-2_Mock	3.52778
3	fer-2_R23	3.72714
3	fer-2_R23	2.60002
3	fer-2_R23	3.18501
3	fer-2_R23	1.71555
3	fer-2_R23	1.97941
3	fer-2_R23	1.67165
3	fer-2_R23	1.98174
3	fer-2_R23	2.04151
3	fer-2_R23	1.9664
3	fer-2_R23	2.69179
3	fer-2_R23	1.83869
3	fer-2_R23	2.20741
3	fer-2_R23	2.57049
3	fer-2_R23	2.2033
3	fer-2_R23	1.55645
3	fer-2_R23	1.55437
3	fer-2_R23	1.29056
3	fer-2_R23	1.84316
3	fer-2_R23	2.4792
3	fer-2_R23	3.41956
3	fer-2_R23	3.00308
