# Supplementary material for: Regulation of immune receptor kinase plasma membrane nanoscale organization by a plant peptide hormone and its receptors
Source: eLife journal article supplement (doi:10.7554/elife.74162), 2022-01-06
Supplement: supp [file elife-74162-supp-v1.zip › elife_poa_e74162_Figure_4_figure_supplement_5_source_data_1.xlsx]

## Sheet: Sheet1
Figure 4 supplement figure 5A
pFLS2::FLS2-GFP
	Mock	Mock	RALF23	RALF23
Time (min)	Mean	SEM	Mean	SEM
5	2.8536	0.082588	2.42396	0.114154
10	3.01066	0.278933	2.05789	0.038103
15	2.77487	0.416041	2.32224	0.247975
20	2.84172	0.123068	2.124	0.116648
25	2.97341	0.350813	2.15486	0.207257
Figure 4 supplement figure 5B
pBAK1::BAK1-mCherry
	Mock	Mock	RALF23	RALF23
Time (min)	Mean	SEM	Mean	SEM
5	2.21081	0.253133	3.029	0.318568
10	2.46756	0.250963	3.06371	0.276641
15	2.2915	0.163583	3.61766	0.705569
20	2.44546	0.0841535	2.87544	0.115291
25	2.23534	0.161048	2.74416	0.117261
