# Supplementary material for: Regulation of immune receptor kinase plasma membrane nanoscale organization by a plant peptide hormone and its receptors
Source: eLife journal article supplement (doi:10.7554/elife.74162), 2022-01-06
Supplement: supp [file elife-74162-supp-v1.zip › elife_poa_e74162_Figure_4_figure_supplement_7_source_data_1.xlsx]

## Sheet: Sheet1
pFLS2::FLS2-GFP
Col-0	Col-0	Col-0	Col-0	fer-2	fer-2	fer-2	fer-2
Mock	Mock	RALF23	RALF23	Mock	Mock	RALF23	RALF23
Fluo. Int.	Spatial clustering index	Fluo. Int.	Spatial clustering index	Fluo. Int.	Spatial clustering index	Fluo. Int.	Spatial clustering index
1149.64	2.45746	693.071	2.03058	1384.61	3.18969	1280.48	3.13164
1126.52	2.55639	878	2.18947	1446.83	2.72852	1344.66	2.92503
1098.07	2.80239	876.819	2.42971	1426.22	2.4832	1237.39	2.75948
1108.04	3.01484	619.585	2.05175	1166.48	2.34221	1209.08	2.32141
880.474	3.08492	720	2.19044	1128.49	3.18619	1137.1	2.66034
977.004	2.98463	850.741	2.65968	1134.86	3.25481	1235.06	2.45969
890.54	2.98448	820.387	2.03763	878.825	2.15474	1034.42	2.35005
827.823	2.8235	580.398	2.08698	894.546	2.15525	1103.98	3.05583
1282.48	3.82864	606.4	2.01847	955.933	2.41003	1078.91	2.01774
1556.21	3.76176	669.028	2.42848	623.712	2.27773	1080.52	3.48321
979.022	2.19808	711.421	2.83857	623.014	2.51998	1046.27	3.11984
846.634	2.47419	657.679	1.72255	607.794	2.36091	1030.33	2.30455
1000.55	2.56138	583.616	2.02873	1033.97	2.42902	1000.05	2.41076
949.873	4.09607	789.786	2.30185	992.966	2.56468	1105.52	2.53397
1030.22	2.60015	736.256	2.43105	1020.1	2.27426	1552.87	2.80549
1116.07	2.61715	856.827	3.5228	911.214	2.35666	1774.62	2.78674
638.259	2.26851	674.451	1.8483	965.026	2.62156	1579.7	3.05582
1342.14	2.45694	702.843	2.78281	979.126	2.45917
1687.41	3.3039	862.604	2.36483	1065.04	2.8708
792.737	2.29962	687.009	1.716	995.328	2.60957
954.179	2.76492	674.095	2.21054	1292.64	2.71867
1132.1	3.40178	681.313	2.12588	947.186	2.68177
		862.119	2.31748	979.415	2.37662
		954.613	3.04399	1012.68	2.242
		746.318	2.36317	933.311	2.23384
		827.325	2.60487	862.284	2.22501
				825.548	2.15618
				1045.97	2.49307
				1149.42	2.13996
				1149.74	2.36062
				1582.44	2.69524
				1832.86	2.74282
				1728.92	3.1109
				1293.57	2.27248
				1343.08	2.22288
				1248.27	2.55562
				689.178	1.61343
				705.869	1.64402
				695.339	2.08638
pBAK1::BAK1-mCherry
Col-0	Col-0	fer-4	fer-4	lrx3/4/5	lrx3/4/5
Fluo. Int.	Spatial clustering index	Fluo. Int.	Spatial clustering index	Fluo. Int.	Spatial clustering index
1612.21	2.57481	1631.05	2.37131	1414.11	3.63802
1545.42	1.72408	1719.22	2.16883	1466.12	4.18962
1484.65	2.33354	1829.02	3.39885	1430.6	4.46938
1857.4	2.62895	1389.37	2.17631	1948.3	3.80295
2016.08	2.09198	1638.48	2.34331	2069.55	2.56921
1881.62	2.94371	2125.72	3.16167	2152.13	2.27177
1638.98	2.367	1701.79	3.55239	1616.26	2.71522
1441.15	2.34159	1573.3	4.65024	1641.75	2.94472
1510.81	2.1724	1509.02	2.76604	1543.7	2.4148
1550.96	2.08716	1718.66	3.18127	1668.53	2.72775
1422.59	2.61494	1420.82	3.1814	1659.43	2.53163
1362.42	1.99017	1604.63	3.05316	1688.57	4.51322
1474.06	2.42057	1828.15	3.67107	1999.77	3.24896
1552.7	2.31375	1897.97	4.2554	1966.3	3.5399
1628.34	2.60206	2143.72	4.21062	1778.02	2.30881
1512.57	2.19608	2349.01	3.94503	1188.18	2.22303
1638.86	2.55419	1961.62	2.98088	1296.39	1.98969
1989.61	2.11542	2242.29	2.8377	1212.77	2.42599
1427.74	2.0364	1337.54	2.23193	1454.05	1.95088
1479.9	2.60364	1413.87	2.59619	1472.78	2.33893
1275.34	2.18006	1509.6	5.05332	1407.08	3.21269
1347.67	2.51454			1586.37	3.12342
1450.99	1.86393			1751.36	3.85297
				1889.47	5.21439
pBAK1::BAK1-mCherry
Col-0	Col-0	Col-0	Col-0	fer-4	fer-4	fer-4	fer-4
Mock	Mock	RALF23	RALF23	Mock	Mock	RALF23	RALF23
Fluo. Int.	Spatial clustering index	Fluo. Int.	Spatial clustering index	Fluo. Int.	Spatial clustering index	Fluo. Int.	Spatial clustering index
1740.86	2.15637	2210.8	3.26134	1291.96	2.27286	1188.74	3.44866
1746.31	2.37806	1922.44	3.24862	1177	4.07381	1063.21	2.19299
1759.75	2.96195	1985.45	3.75398	1386.93	4.01636	1314.6	3.29211
1809.52	2.71652	1761.18	2.23001	1340.69	2.52543	1386.59	3.11775
1515.41	3.06566	2129.34	3.92196	1585.72	3.2732	1555.69	3.82706
1682.41	3.34948	1613.62	1.94536	1442.89	2.21279	1220.24	5.32483
1547.5	2.72254	1587.19	3.68798	1908.54	2.13997	1833.1	3.23465
1569.1	2.21866	1683.11	2.85622	2017.61	3.03049	1788.86	3.32738
1476.28	1.90711	1890.02	2.36059	2213.02	3.23628	2002.81	3.59692
1822.25	1.93438	2094.84	2.89481	2077.04	3.50625	1735.3	3.99149
1840.25	1.89984	2304.96	5.79219	2476.8	3.91719	1998.33	6.23065
1655.19	1.74342	2346.79	3.71429	1650.76	2.797	1762.69	4.61187
2153.57	2.28257	1876.68	2.86754	1582.67	2.57103	1367.4	2.87108
2115.69	2.35677	2432.46	3.74758	1626.65	3.80237	1571.81	2.94272
2092.2	2.17105	1759.57	1.89144	1990.51	4.72222	1575.65	5.73039
1349	2.21203	1576.6	3.24199	2155.58	6.55751	1478.39	4.95052
1390.12	1.75772	1606.92	2.23787	1916.54	4.68874	1646.64	3.91556
1625.23	2.13653	2342.25	3.06082	1525.43	3.02597	1905.64	2.77025
2063.72	2.54594	2176.84	2.22977	1615.29	3.62612	1698.48	3.3707
1779.72	3.10113	1939.5	1.86044	1755.25	2.95205	1621.11	4.12954
1686.67	2.12216	1870.46	2.99326			1514.27	4.44215
1669.6	2.18087	1769.43	2.40655			1359.81	3.32755
1731.1	1.96081	1994.72	3.92636			1346.5	3.55327
1503.68	2.05851					1383.67	2.39936
						1222.33	3.3708
						1222.57	3.57223
						1212.86	3.69027
