# Supplementary material for: Regulation of immune receptor kinase plasma membrane nanoscale organization by a plant peptide hormone and its receptors
Source: eLife journal article supplement (doi:10.7554/elife.74162), 2022-01-06
Supplement: supp [file elife-74162-supp-v1.zip › elife_poa_e74162_Figure_4_figure_supplement_8_source_data_1.pdf]

Source Data Figure 4 – supplement figure 8A

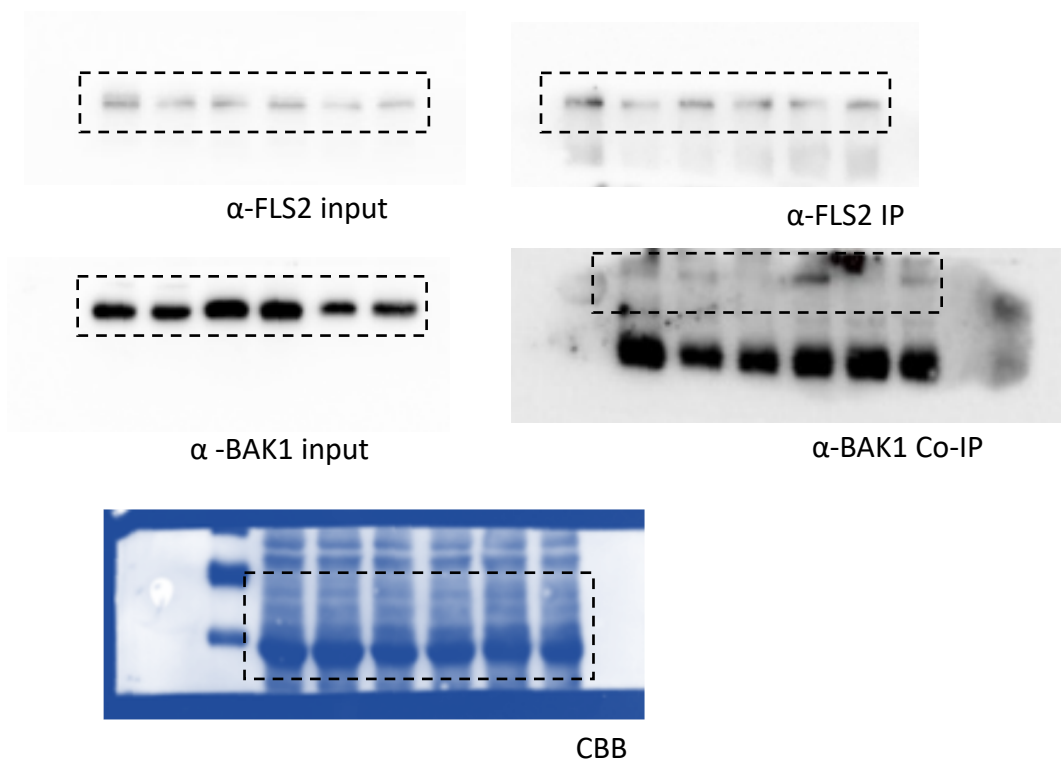

Source Data Figure 4 – supplement figure 8B

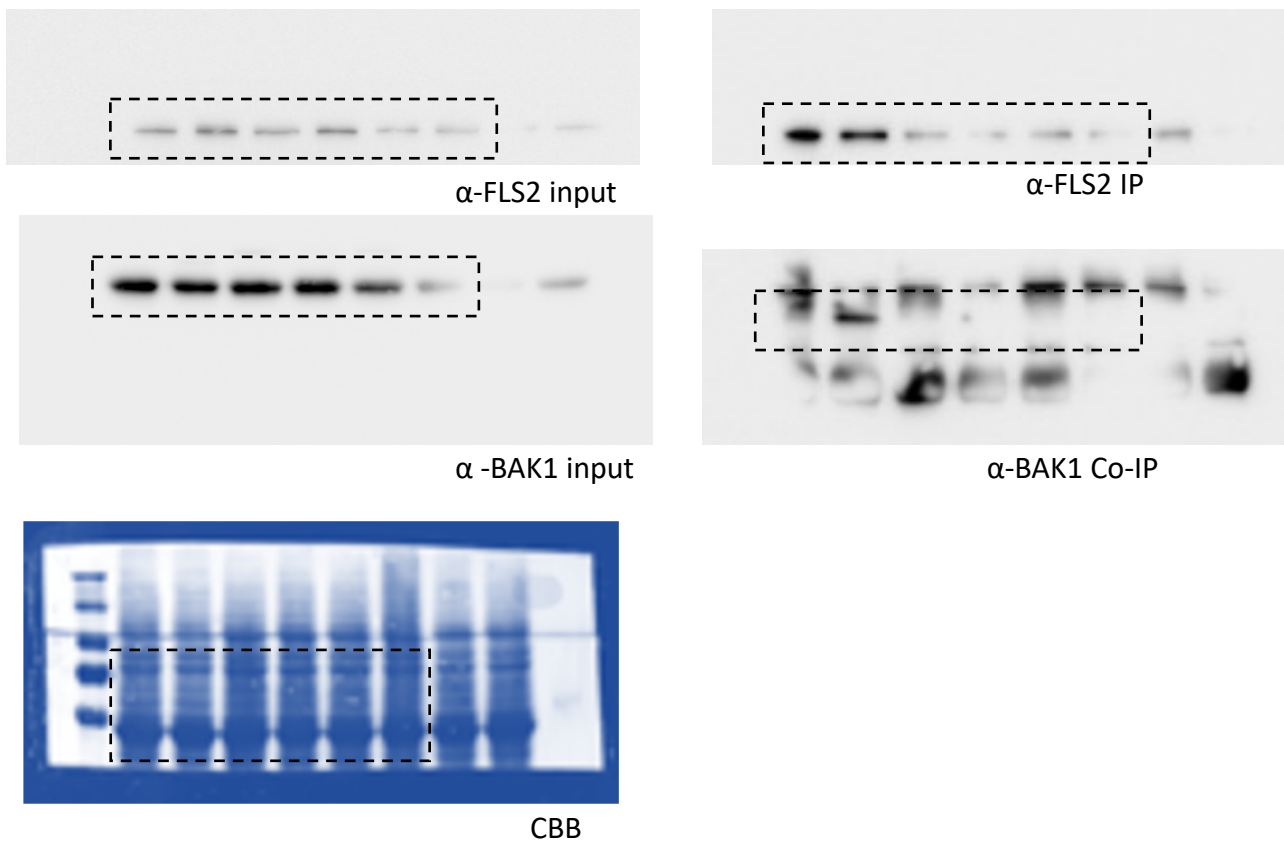

Source Data Figure 4 – supplement figure 8E

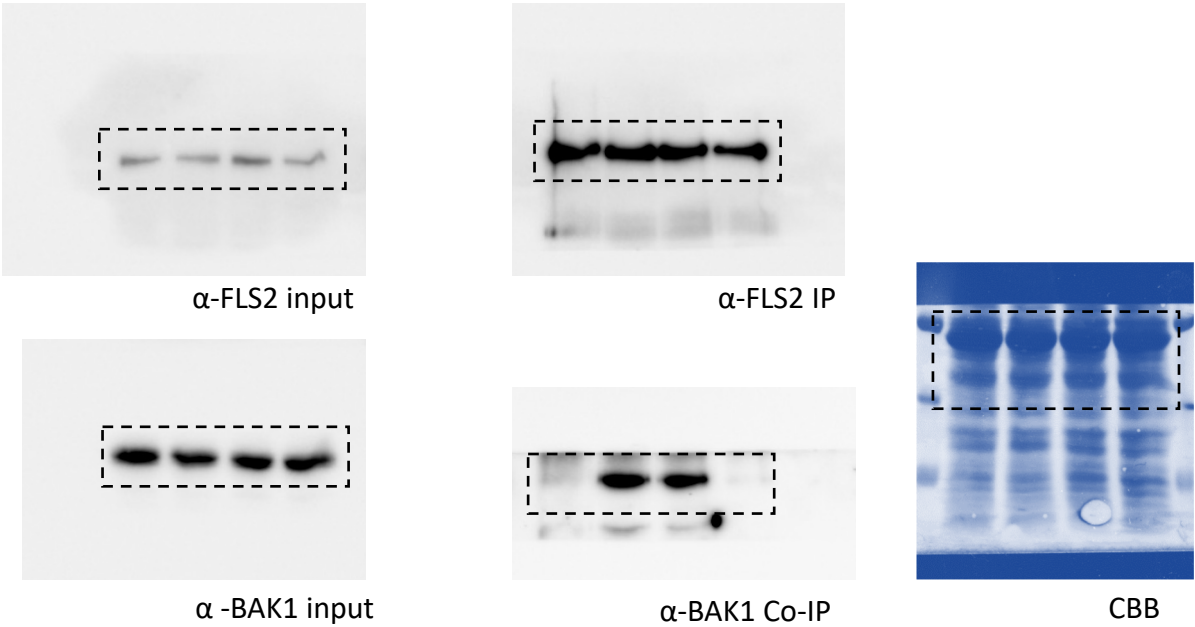

Source Data Figure 4 – supplement figure 8F

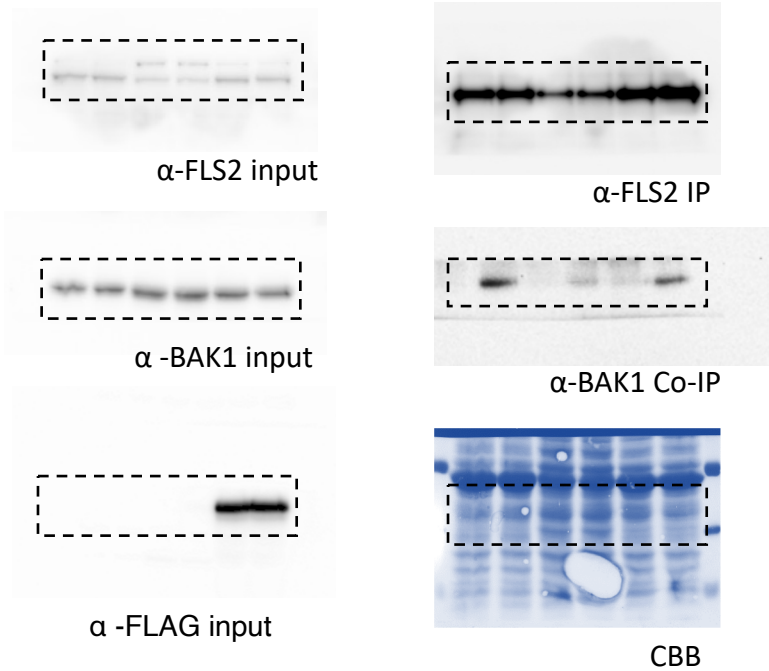

Source Data Figure 4 – supplement figure 8C

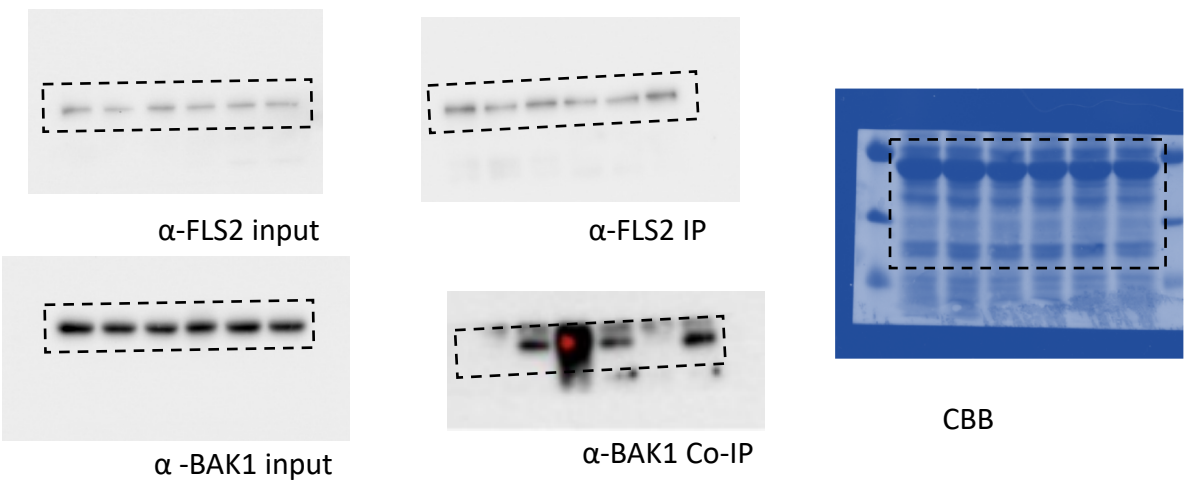

Source Data Figure 4 – supplement figure 8D

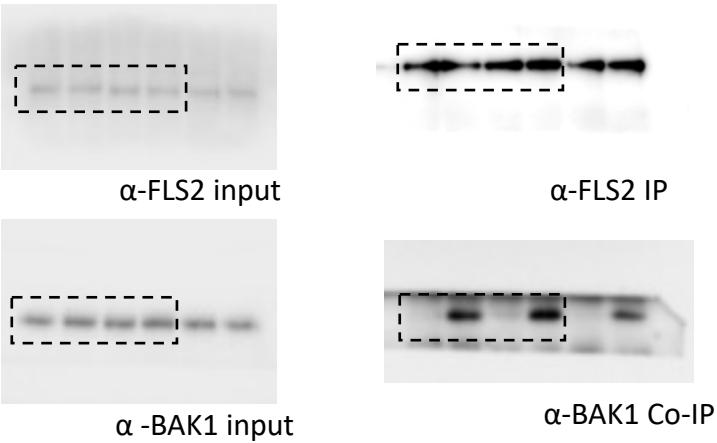

Source Data Figure 4 – supplement figure 8G

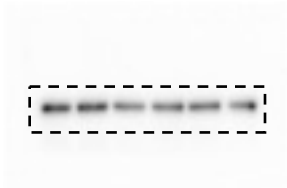

$\alpha$ -FLS2 input

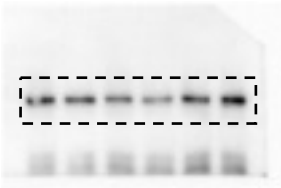

$\alpha$ -FLS2 IP

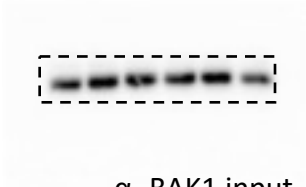

$\alpha$ -BAK1 input

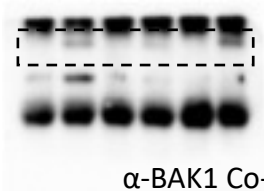

$\alpha$ -BAK1 Co-IP

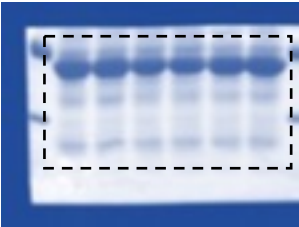

CBB

Source Data Figure 4 – supplement figure 8H

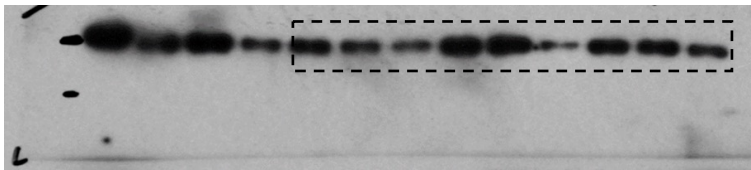

$\alpha$ -FLS2 IP

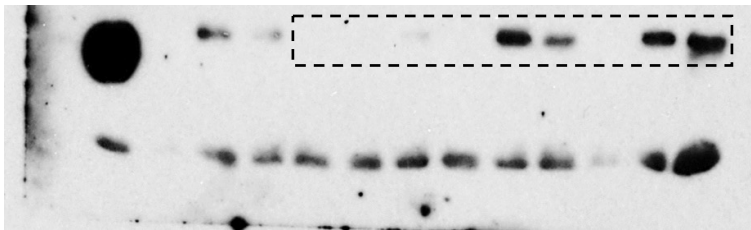

$\alpha$ -BAK1 Co-IP

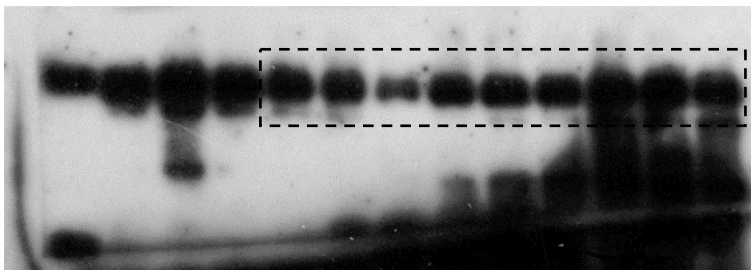

$\alpha$ -FLS2 input

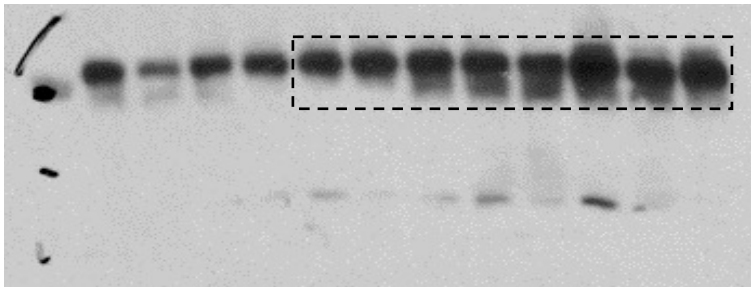

$\alpha$  -BAK1 input

Source Data Figure 4 – supplement figure 8I

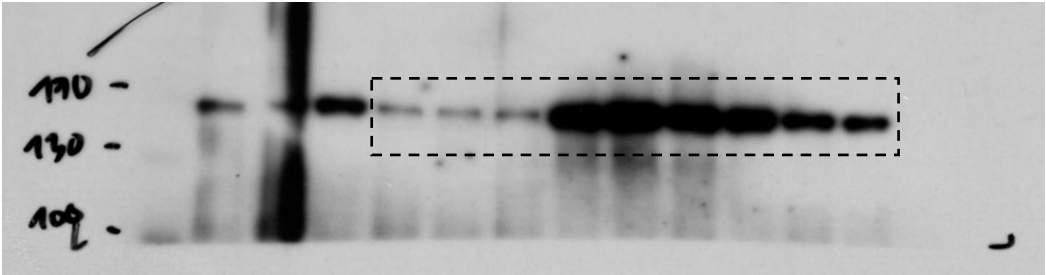

α-FLS2 IP

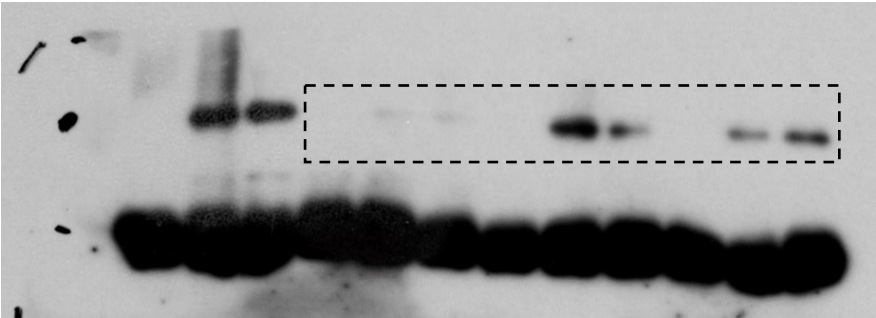

α-BAK1 Co-IP

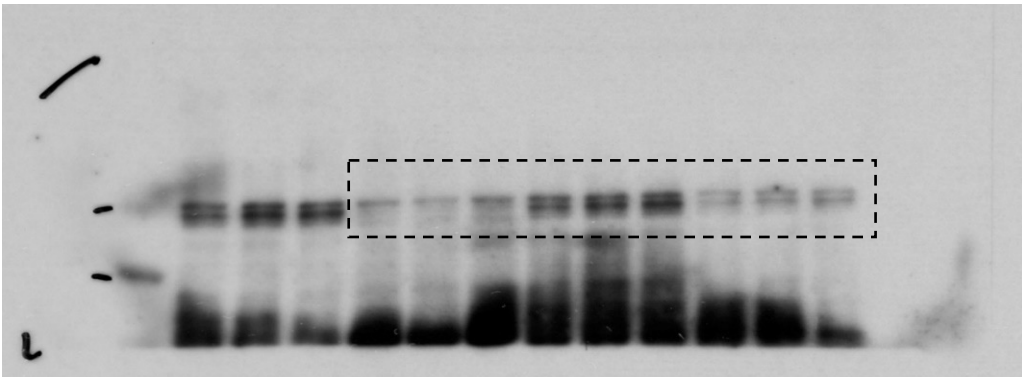

α-FLS2 input

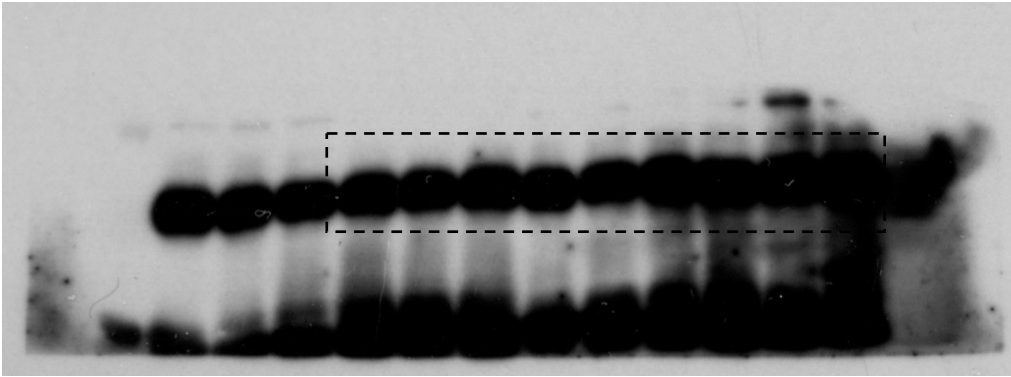

α -BAK1 input
