# Supplementary material for: Regulation of immune receptor kinase plasma membrane nanoscale organization by a plant peptide hormone and its receptors
Source: eLife journal article supplement (doi:10.7554/elife.74162), 2022-01-06
Supplement: supp [file elife-74162-supp-v1.zip › elife_poa_e74162_Figure_4_source_data_1.xlsx]

## Sheet: Sheet1
Replicate	Genotype	Values
1	Col-0_Mock	1.89366		Replicate 1+2+3
1	Col-0_Mock	3.87174		Number of families	1
1	Col-0_Mock	2.59825		Number of comparisons per family	6
1	Col-0_Mock	2.40883		Alpha	0.05
1	Col-0_Mock	3.8064
1	Col-0_Mock	2.46463		Dunn's multiple comparisons test	Mean rank diff.	Significant?	Summary	Adjusted P Value
1	Col-0_Mock	2.40801		Col-0_Mock vs. Col-0_RALF23	-80.44	Yes	****	<0.0001	A-B
1	Col-0_Mock	1.88838		Col-0_Mock vs. fer-4_Mock	-86.33	Yes	****	<0.0001	A-C
1	Col-0_Mock	1.78143		Col-0_Mock vs. fer-4_RALF23	-95.83	Yes	****	<0.0001	A-D
1	Col-0_Mock	2.5061		Col-0_RALF23 vs. fer-4_Mock	-5.889	No	ns	>0.9999	B-C
1	Col-0_Mock	2.06806		Col-0_RALF23 vs. fer-4_RALF23	-15.4	No	ns	>0.9999	B-D
1	Col-0_Mock	2.5078		fer-4_Mock vs. fer-4_RALF23	-9.508	No	ns	>0.9999	C-D
1	Col-0_Mock	1.9334
1	Col-0_Mock	1.90993		Test details	Mean rank 1	Mean rank 2	Mean rank diff.	n1	n2	Z
1	Col-0_Mock	2.09096		Col-0_Mock vs. Col-0_RALF23	63.5	143.9	-80.44	68	63	6.261
1	Col-0_Mock	3.86796		Col-0_Mock vs. fer-4_Mock	63.5	149.8	-86.33	68	63	6.719
1	Col-0_Mock	2.88075		Col-0_Mock vs. fer-4_RALF23	63.5	159.3	-95.83	68	60	7.365
1	Col-0_Mock	2.59654		Col-0_RALF23 vs. fer-4_Mock	143.9	149.8	-5.889	63	63	0.4499
1	Col-0_Mock	2.5819		Col-0_RALF23 vs. fer-4_RALF23	143.9	159.3	-15.4	63	60	1.162
1	Col-0_Mock	3.98737		fer-4_Mock vs. fer-4_RALF23	149.8	159.3	-9.508	63	60	0.7174
1	Col-0_Mock	5.19436
1	Col-0_R23	3.39093		Replicate 1
1	Col-0_R23	4.13053		Number of families	1
1	Col-0_R23	3.42697		Number of comparisons per family	6
1	Col-0_R23	3.63552		Alpha	0.05
1	Col-0_R23	2.73745
1	Col-0_R23	3.02213		Dunn's multiple comparisons test	Mean rank diff.	Significant?	Summary	Adjusted P Value
1	Col-0_R23	4.78575		Col-0_Mock vs. Col-0_RALF23	-26.67	Yes	***	0.0004	A-B
1	Col-0_R23	5.28299		Col-0_Mock vs. fer-4_Mock	-22.26	Yes	**	0.0088	A-C
1	Col-0_R23	4.89163		Col-0_Mock vs. fer-4_RALF23	-21.43	Yes	*	0.0218	A-D
1	Col-0_R23	3.75825		Col-0_RALF23 vs. fer-4_Mock	4.405	No	ns	>0.9999	B-C
1	Col-0_R23	4.72766		Col-0_RALF23 vs. fer-4_RALF23	5.238	No	ns	>0.9999	B-D
1	Col-0_R23	5.34594		fer-4_Mock vs. fer-4_RALF23	0.8333	No	ns	>0.9999	C-D
1	Col-0_R23	4.86781
1	Col-0_R23	4.27587		Test details	Mean rank 1	Mean rank 2	Mean rank diff.	n1	n2	Z
1	Col-0_R23	4.02255		Col-0_Mock vs. Col-0_RALF23	20.9	47.57	-26.67	21	21	3.965
1	Col-0_R23	3.98512		Col-0_Mock vs. fer-4_Mock	20.9	43.17	-22.26	21	18	3.18
1	Col-0_R23	3.38271		Col-0_Mock vs. fer-4_RALF23	20.9	42.33	-21.43	21	15	2.908
1	Col-0_R23	4.35504		Col-0_RALF23 vs. fer-4_Mock	47.57	43.17	4.405	21	18	0.6292
1	Col-0_R23	4.24878		Col-0_RALF23 vs. fer-4_RALF23	47.57	42.33	5.238	21	15	0.7109
1	Col-0_R23	3.62944		fer-4_Mock vs. fer-4_RALF23	43.17	42.33	0.8333	18	15	0.1094
1	Col-0_R23	3.08129
1	fer-4_Mock	5.93068		Replicate 2
1	fer-4_Mock	5.30613		Number of families	1
1	fer-4_Mock	3.8092		Number of comparisons per family	6
1	fer-4_Mock	6.9936		Alpha	0.05
1	fer-4_Mock	3.45178
1	fer-4_Mock	7.11401		Dunn's multiple comparisons test	Mean rank diff.	Significant?	Summary	Adjusted P Value
1	fer-4_Mock	4.53484		Col-0_Mock vs. Col-0_RALF23	-23.92	Yes	*	0.0176	A-B
1	fer-4_Mock	3.10877		Col-0_Mock vs. fer-4_Mock	-34.27	Yes	***	0.0002	A-C
1	fer-4_Mock	2.07455		Col-0_Mock vs. fer-4_RALF23	-44.38	Yes	****	<0.0001	A-D
1	fer-4_Mock	2.54657		Col-0_RALF23 vs. fer-4_Mock	-10.35	No	ns	>0.9999	B-C
1	fer-4_Mock	3.27408		Col-0_RALF23 vs. fer-4_RALF23	-20.47	No	ns	0.0529	B-D
1	fer-4_Mock	3.54713		fer-4_Mock vs. fer-4_RALF23	-10.12	No	ns	>0.9999	C-D
1	fer-4_Mock	2.07627
1	fer-4_Mock	3.37944		Test details	Mean rank 1	Mean rank 2	Mean rank diff.	n1	n2	Z
1	fer-4_Mock	5.12721		Col-0_Mock vs. Col-0_RALF23	22.54	46.46	-23.92	24	24	2.974
1	fer-4_Mock	4.37328		Col-0_Mock vs. fer-4_Mock	22.54	56.81	-34.27	24	21	4.117
1	fer-4_Mock	2.24964		Col-0_Mock vs. fer-4_RALF23	22.54	66.93	-44.38	24	27	5.679
1	fer-4_Mock	4.72561		Col-0_RALF23 vs. fer-4_Mock	46.46	56.81	-10.35	24	21	1.244
1	fer-4_R23	3.6316		Col-0_RALF23 vs. fer-4_RALF23	46.46	66.93	-20.47	24	27	2.619
1	fer-4_R23	7.72266		fer-4_Mock vs. fer-4_RALF23	56.81	66.93	-10.12	21	27	1.248
1	fer-4_R23	3.7576
1	fer-4_R23	4.97316		Replicate 3
1	fer-4_R23	2.28959		Number of families	1
1	fer-4_R23	3.95309		Number of comparisons per family	6
1	fer-4_R23	2.7841		Alpha	0.05
1	fer-4_R23	3.29101
1	fer-4_R23	2.90524		Dunn's multiple comparisons test	Mean rank diff.	Significant?	Summary	Adjusted P Value
1	fer-4_R23	6.70102		Col-0_Mock vs. Col-0_RALF23	-29.85	Yes	***	0.0005	A-B
1	fer-4_R23	3.57557		Col-0_Mock vs. fer-4_Mock	-33.56	Yes	****	<0.0001	A-C
1	fer-4_R23	5.54459		Col-0_Mock vs. fer-4_RALF23	-33.07	Yes	****	<0.0001	A-D
1	fer-4_R23	4.34958		Col-0_RALF23 vs. fer-4_Mock	-3.708	No	ns	>0.9999	B-C
1	fer-4_R23	2.49613		Col-0_RALF23 vs. fer-4_RALF23	-3.222	No	ns	>0.9999	B-D
1	fer-4_R23	3.00975		fer-4_Mock vs. fer-4_RALF23	0.4861	No	ns	>0.9999	C-D
2	Col-0_Mock	2.15637
2	Col-0_Mock	2.37806		Test details	Mean rank 1	Mean rank 2	Mean rank diff.	n1	n2	Z
2	Col-0_Mock	2.96195		Col-0_Mock vs. Col-0_RALF23	18.65	48.5	-29.85	23	18	3.935
2	Col-0_Mock	2.71652		Col-0_Mock vs. fer-4_Mock	18.65	52.21	-33.56	23	24	4.771
2	Col-0_Mock	3.06566		Col-0_Mock vs. fer-4_RALF23	18.65	51.72	-33.07	23	18	4.36
2	Col-0_Mock	3.34948		Col-0_RALF23 vs. fer-4_Mock	48.5	52.21	-3.708	18	24	0.4934
2	Col-0_Mock	2.72254		Col-0_RALF23 vs. fer-4_RALF23	48.5	51.72	-3.222	18	18	0.401
2	Col-0_Mock	2.21866		fer-4_Mock vs. fer-4_RALF23	52.21	51.72	0.4861	24	18	0.06468
2	Col-0_Mock	1.90711
2	Col-0_Mock	1.93438
2	Col-0_Mock	1.89984
2	Col-0_Mock	1.74342
2	Col-0_Mock	2.28257
2	Col-0_Mock	2.35677
2	Col-0_Mock	2.17105
2	Col-0_Mock	2.21203
2	Col-0_Mock	1.75772
2	Col-0_Mock	2.13653
2	Col-0_Mock	2.54594
2	Col-0_Mock	3.10113
2	Col-0_Mock	2.12216
2	Col-0_Mock	2.18087
2	Col-0_Mock	1.96081
2	Col-0_Mock	2.05851
2	Col-0_R23	3.26134
2	Col-0_R23	3.24862
2	Col-0_R23	3.75398
2	Col-0_R23	2.23001
2	Col-0_R23	3.92196
2	Col-0_R23	1.94536
2	Col-0_R23	3.68798
2	Col-0_R23	2.85622
2	Col-0_R23	2.36059
2	Col-0_R23	2.89481
2	Col-0_R23	5.79219
2	Col-0_R23	3.71429
2	Col-0_R23	2.86754
2	Col-0_R23	3.74758
2	Col-0_R23	1.89144
2	Col-0_R23	3.24199
2	Col-0_R23	2.23787
2	Col-0_R23	3.06082
2	Col-0_R23	2.22977
2	Col-0_R23	1.86044
2	Col-0_R23	2.99326
2	Col-0_R23	2.40655
2	Col-0_R23	3.92636
2	Col-0_R23	2.40056
2	fer-4_Mock	2.27286
2	fer-4_Mock	4.07381
2	fer-4_Mock	4.01636
2	fer-4_Mock	2.52543
2	fer-4_Mock	3.2732
2	fer-4_Mock	2.21279
2	fer-4_Mock	2.13997
2	fer-4_Mock	3.03049
2	fer-4_Mock	3.23628
2	fer-4_Mock	3.50625
2	fer-4_Mock	3.91719
2	fer-4_Mock	2.797
2	fer-4_Mock	2.57103
2	fer-4_Mock	3.80237
2	fer-4_Mock	4.72222
2	fer-4_Mock	6.55751
2	fer-4_Mock	4.68874
2	fer-4_Mock	3.02597
2	fer-4_Mock	3.62612
2	fer-4_Mock	2.95205
2	fer-4_Mock	2.72377
2	fer-4_R23	3.44866
2	fer-4_R23	2.19299
2	fer-4_R23	3.29211
2	fer-4_R23	3.11775
2	fer-4_R23	3.82706
2	fer-4_R23	5.32483
2	fer-4_R23	3.23465
2	fer-4_R23	3.32738
2	fer-4_R23	3.59692
2	fer-4_R23	3.99149
2	fer-4_R23	6.23065
2	fer-4_R23	4.61187
2	fer-4_R23	2.87108
2	fer-4_R23	2.94272
2	fer-4_R23	5.73039
2	fer-4_R23	4.95052
2	fer-4_R23	3.91556
2	fer-4_R23	2.77025
2	fer-4_R23	3.3707
2	fer-4_R23	4.12954
2	fer-4_R23	4.44215
2	fer-4_R23	3.32755
2	fer-4_R23	3.55327
2	fer-4_R23	2.39936
2	fer-4_R23	3.3708
2	fer-4_R23	3.57223
2	fer-4_R23	3.69027
3	Col-0_Mock	2.57481
3	Col-0_Mock	1.72408
3	Col-0_Mock	2.33354
3	Col-0_Mock	2.62895
3	Col-0_Mock	2.09198
3	Col-0_Mock	2.94371
3	Col-0_Mock	2.367
3	Col-0_Mock	2.34159
3	Col-0_Mock	2.1724
3	Col-0_Mock	2.08716
3	Col-0_Mock	2.61494
3	Col-0_Mock	1.99017
3	Col-0_Mock	2.42057
3	Col-0_Mock	2.31375
3	Col-0_Mock	2.60206
3	Col-0_Mock	2.19608
3	Col-0_Mock	2.55419
3	Col-0_Mock	2.11542
3	Col-0_Mock	2.0364
3	Col-0_Mock	2.60364
3	Col-0_Mock	2.18006
3	Col-0_Mock	2.51454
3	Col-0_Mock	1.86393
3	Col-0_R23	2.48663
3	Col-0_R23	2.33724
3	Col-0_R23	4.26312
3	Col-0_R23	3.06058
3	Col-0_R23	3.3913
3	Col-0_R23	3.28605
3	Col-0_R23	2.51377
3	Col-0_R23	3.33334
3	Col-0_R23	4.50527
3	Col-0_R23	4.1239
3	Col-0_R23	2.22381
3	Col-0_R23	3.88241
3	Col-0_R23	2.89067
3	Col-0_R23	2.66857
3	Col-0_R23	3.06708
3	Col-0_R23	3.82637
3	Col-0_R23	2.60054
3	Col-0_R23	2.88777
3	fer-4_Mock	2.37131
3	fer-4_Mock	2.16883
3	fer-4_Mock	3.39885
3	fer-4_Mock	2.17631
3	fer-4_Mock	2.34331
3	fer-4_Mock	3.16167
3	fer-4_Mock	3.55239
3	fer-4_Mock	4.65024
3	fer-4_Mock	2.76604
3	fer-4_Mock	3.18127
3	fer-4_Mock	3.1814
3	fer-4_Mock	3.05316
3	fer-4_Mock	6.20425
3	fer-4_Mock	5.90639
3	fer-4_Mock	6.22718
3	fer-4_Mock	3.67107
3	fer-4_Mock	4.2554
3	fer-4_Mock	4.21062
3	fer-4_Mock	3.94503
3	fer-4_Mock	2.98088
3	fer-4_Mock	2.8377
3	fer-4_Mock	2.23193
3	fer-4_Mock	2.59619
3	fer-4_Mock	5.05332
3	fer-4_R23	2.53514
3	fer-4_R23	4.22272
3	fer-4_R23	4.75337
3	fer-4_R23	2.43636
3	fer-4_R23	5.76175
3	fer-4_R23	3.3115
3	fer-4_R23	3.32305
3	fer-4_R23	2.23035
3	fer-4_R23	2.66098
3	fer-4_R23	4.50303
3	fer-4_R23	3.51647
3	fer-4_R23	3.82648
3	fer-4_R23	2.63258
3	fer-4_R23	2.90187
3	fer-4_R23	2.61023
3	fer-4_R23	2.66021
3	fer-4_R23	3.03211
3	fer-4_R23	4.19318
