# Supplementary figures and images for: Regulation of immune receptor kinase plasma membrane nanoscale organization by a plant peptide hormone and its receptors
Source: eLife journal article supplement (doi:10.7554/elife.74162), 2022-01-06

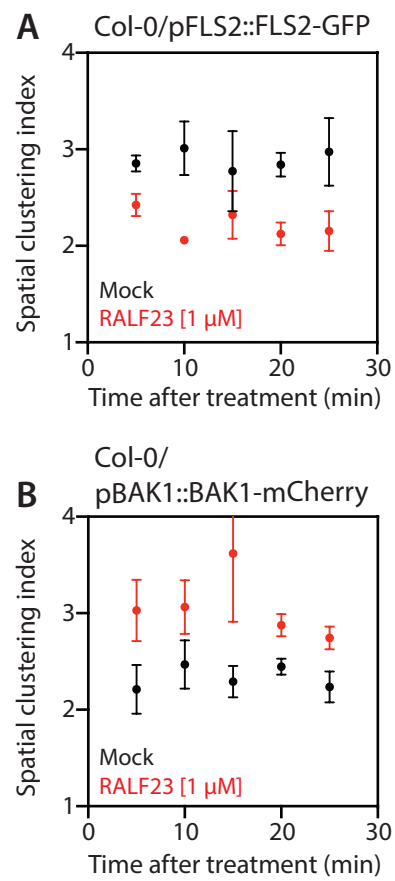

Figure 4 - supplement figure 5 | Time-resolved analysis of the spatial clustering index.

Supplement: supp [file elife-74162-supp-v1.zip]

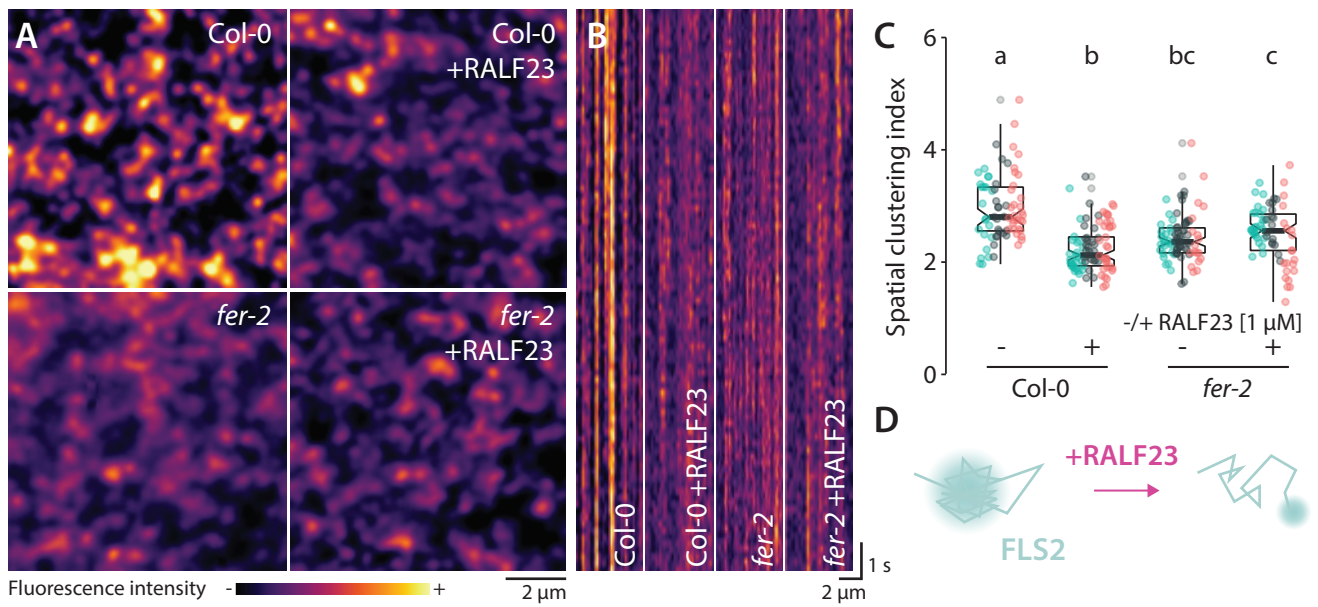

Figure 4 - supplement figure 4 | Analysis of FLS2-GFP organization upon RALF23 treatment.

Supplement: supp [file elife-74162-supp-v1.zip]

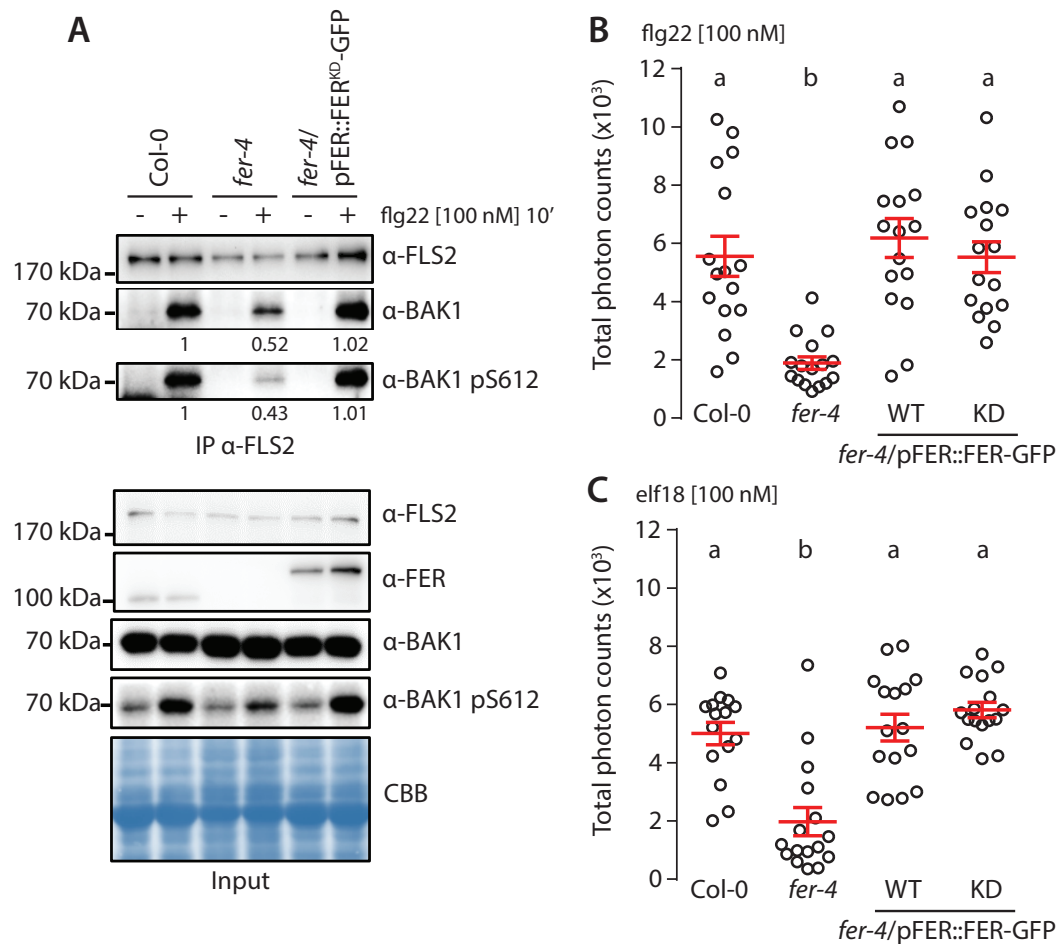

Figure 4 - supplement figure 1 | FER kinase activity is dispensable to support PTI signaling.

Supplement: supp [file elife-74162-supp-v1.zip]

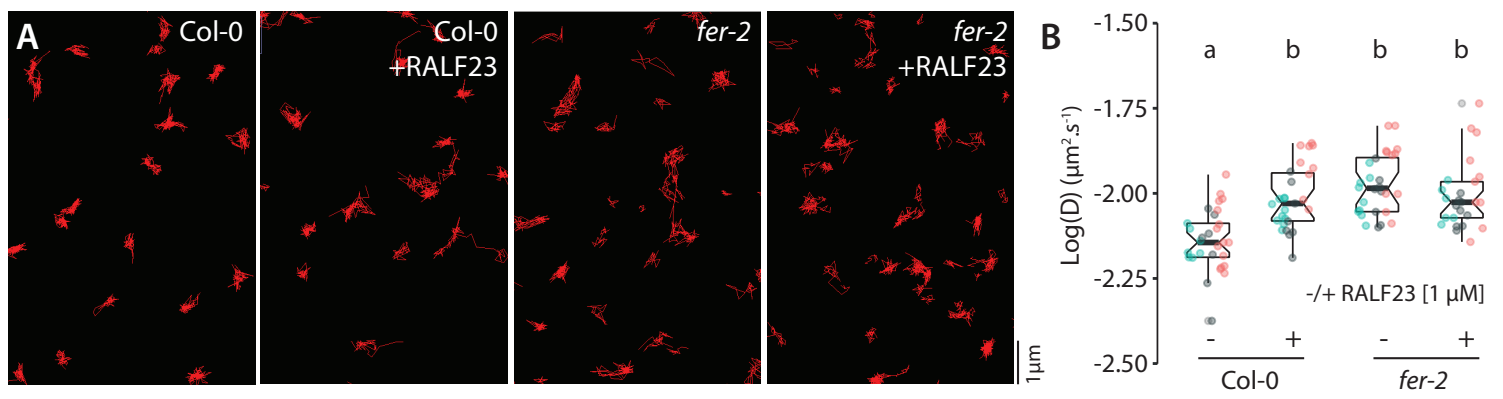

Figure 4 - supplement figure 3 | Analysis of FLS2-GFP single particle dynamics upon RALF23 treatment.

Supplement: supp [file elife-74162-supp-v1.zip]

Source Data Figure 4 – supplement figure 2A

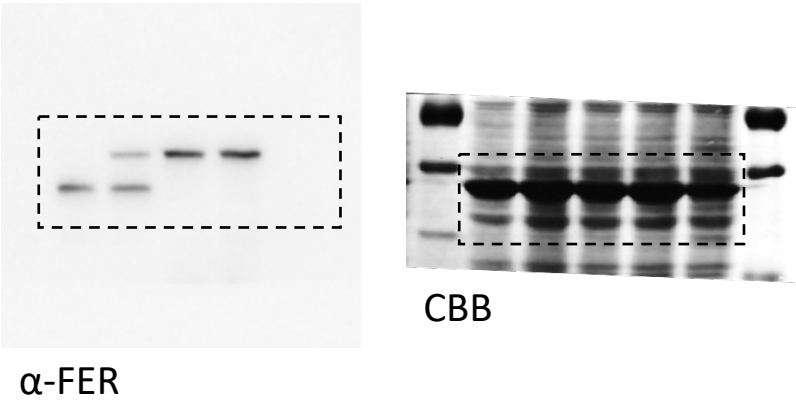

Source Data Figure 4 – supplement figure 2B

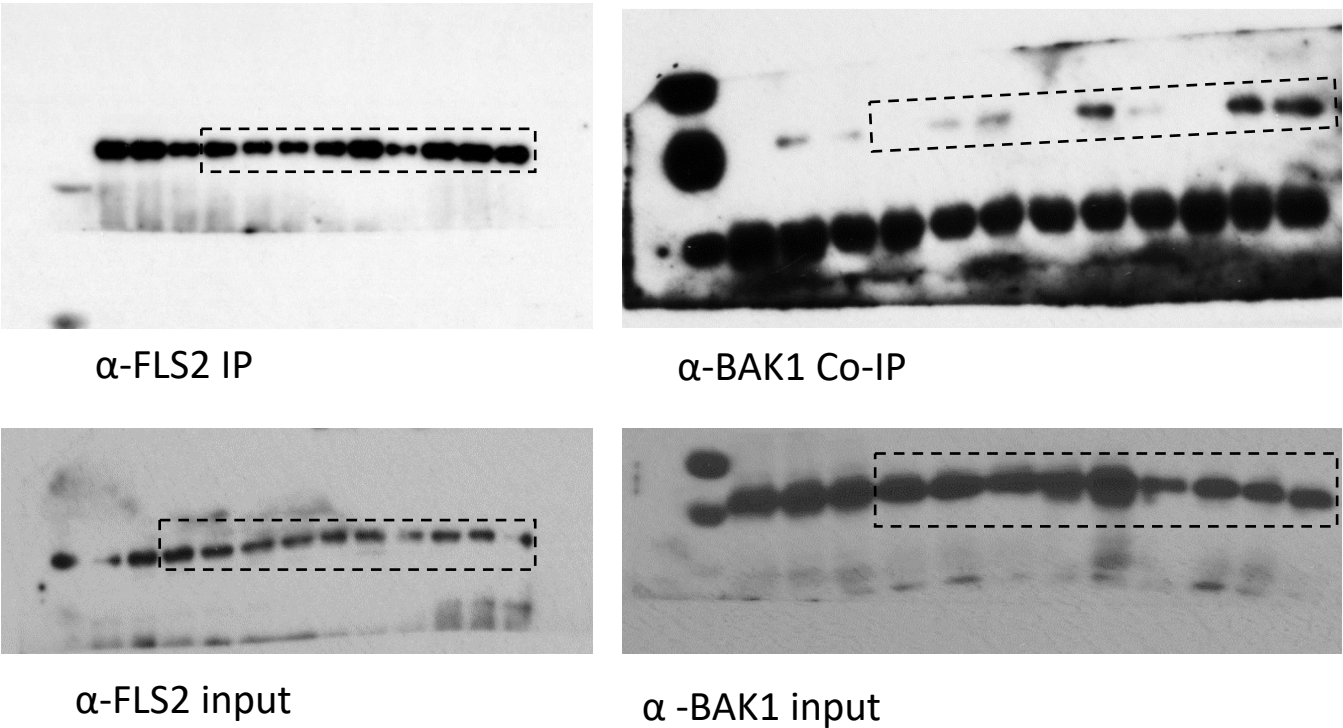

Supplement: supp [file elife-74162-supp-v1.zip]

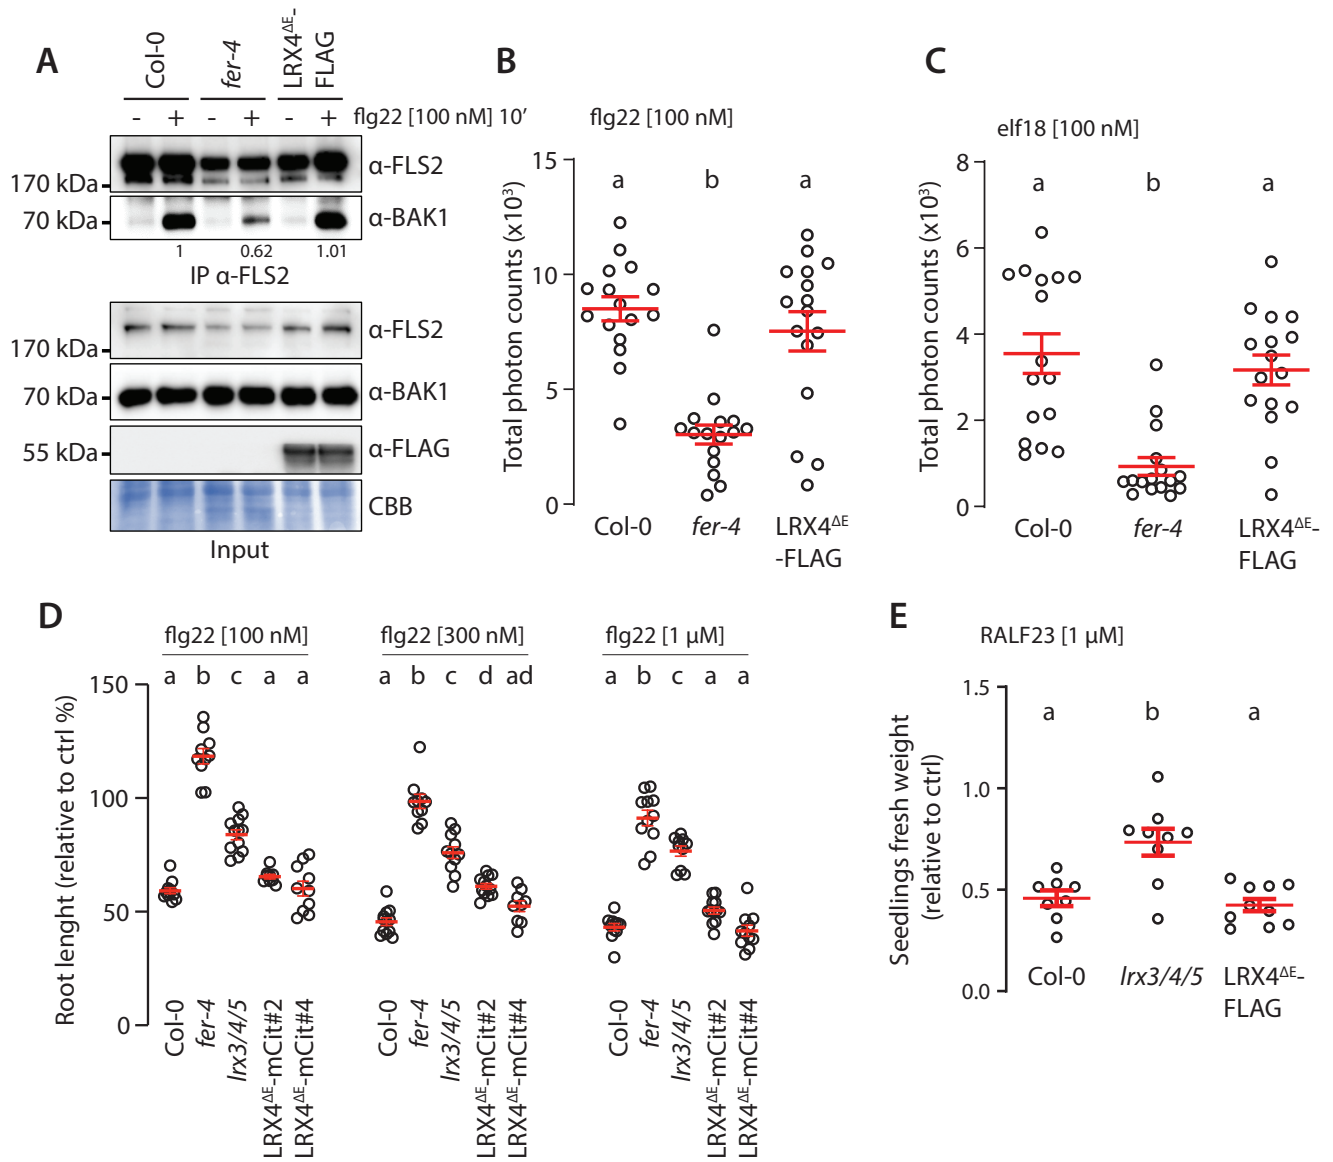

Figure 3 - supplement figure 1 | Overexpression of LRX4<sup>ΔE</sup> does not affect PTI.

Supplement: supp [file elife-74162-supp-v1.zip]

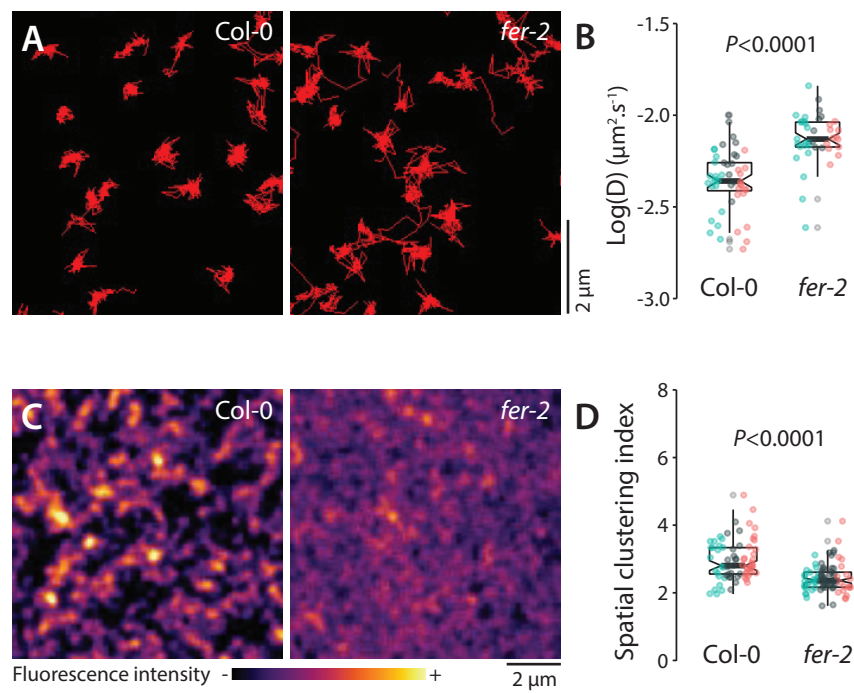

Figure 1 - supplement figure 2 | Analysis of FLS2-GFP organization and dynamics in *fer-2*.

Supplement: supp [file elife-74162-supp-v1.zip]

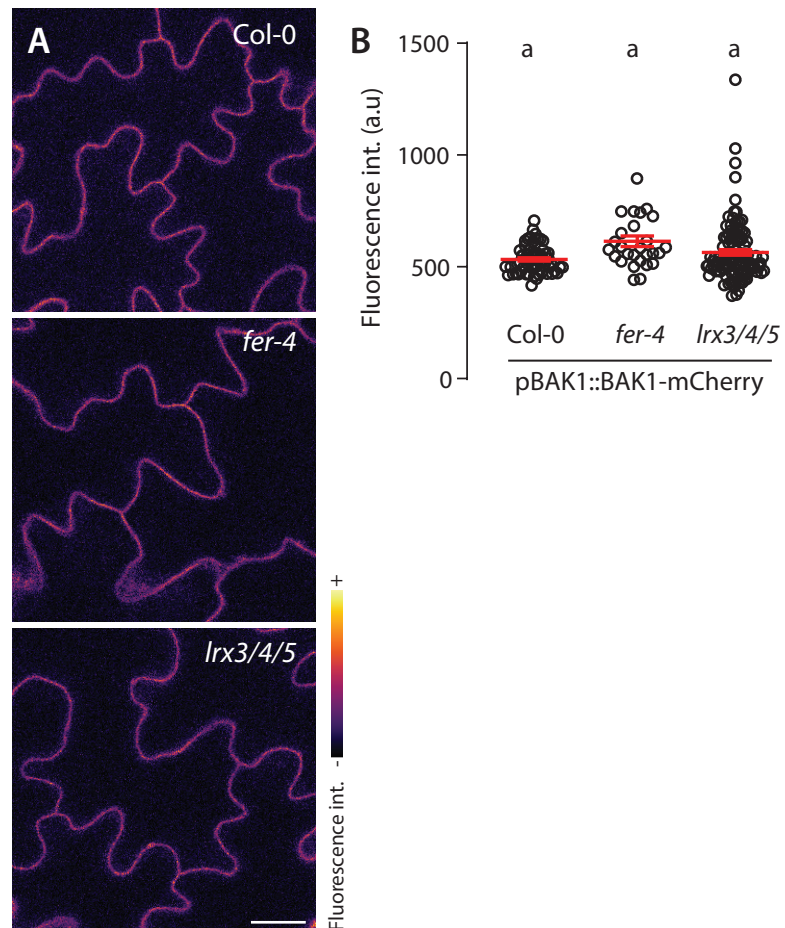

Figure 2 - supplement figure 1 | Subcellular localization of BAK1-mCherry in *fer-4* and *lrx3/4/5*.

Supplement: supp [file elife-74162-supp-v1.zip]

Source Data Fig. 2A

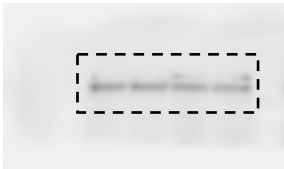

$\alpha$ -FLS2 input

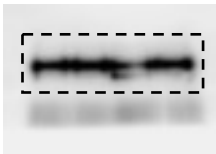

$\alpha$ -FLS2 IP

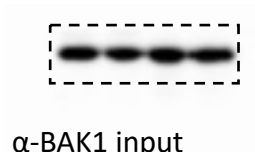

$\alpha$ -BAK1 input

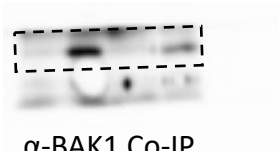

$\alpha$ -BAK1 Co-IP

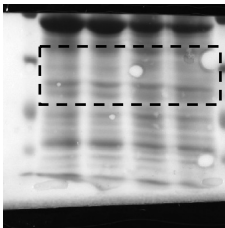

CBB input

Supplement: supp [file elife-74162-supp-v1.zip › elife_poa_e74162_Figure_2_source_data_2.pdf]

Source Data Figure 2 – supplement figure 2

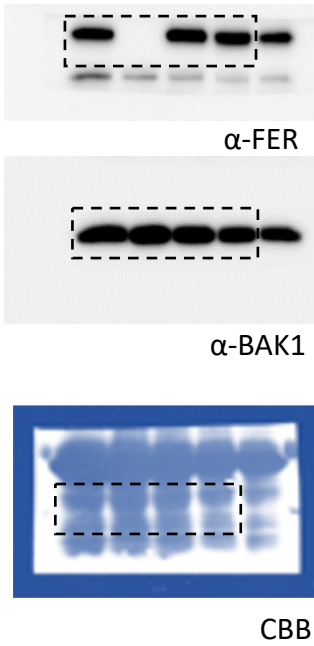

Supplement: supp [file elife-74162-supp-v1.zip › elife_poa_e74162_Figure_2_figure_supplement_2_source_data_1.pdf]

Source Data Figure 3 – supplement figure 1

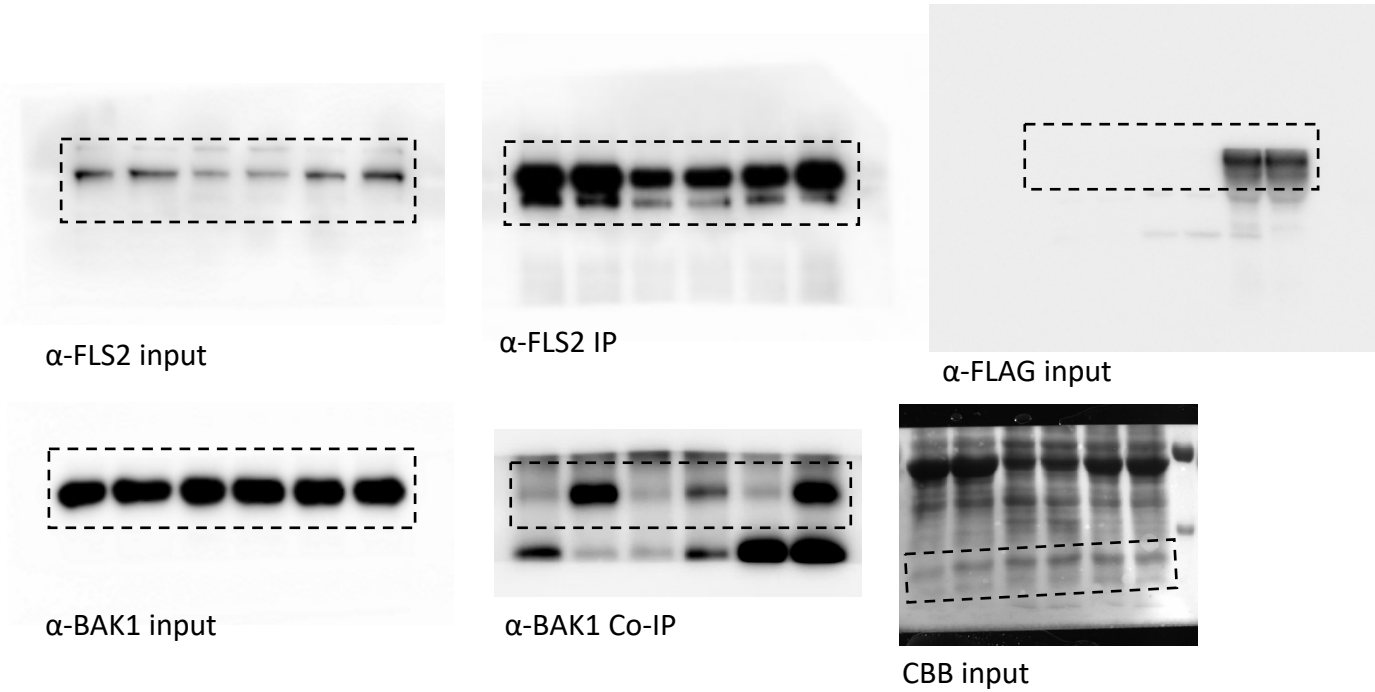

Supplement: supp [file elife-74162-supp-v1.zip › elife_poa_e74162_Figure_3_figure_supplement_1_source_data_2.pdf]

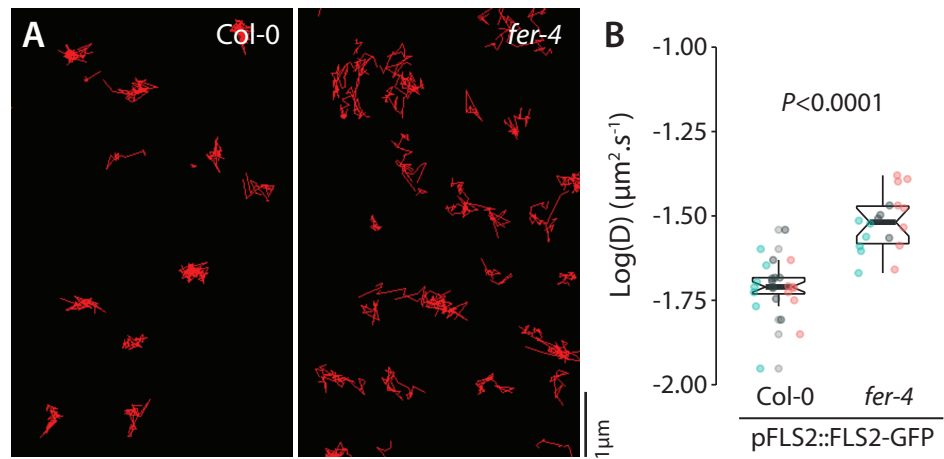

Figure 1 - supplement figure 1 | Analysis of FLS2-GFP single particle dynamics in *fer-4*.

Supplement: supp [file elife-74162-supp-v1.zip › elife_poa_e74162_Figure_1_figure_supplement_1.pdf]

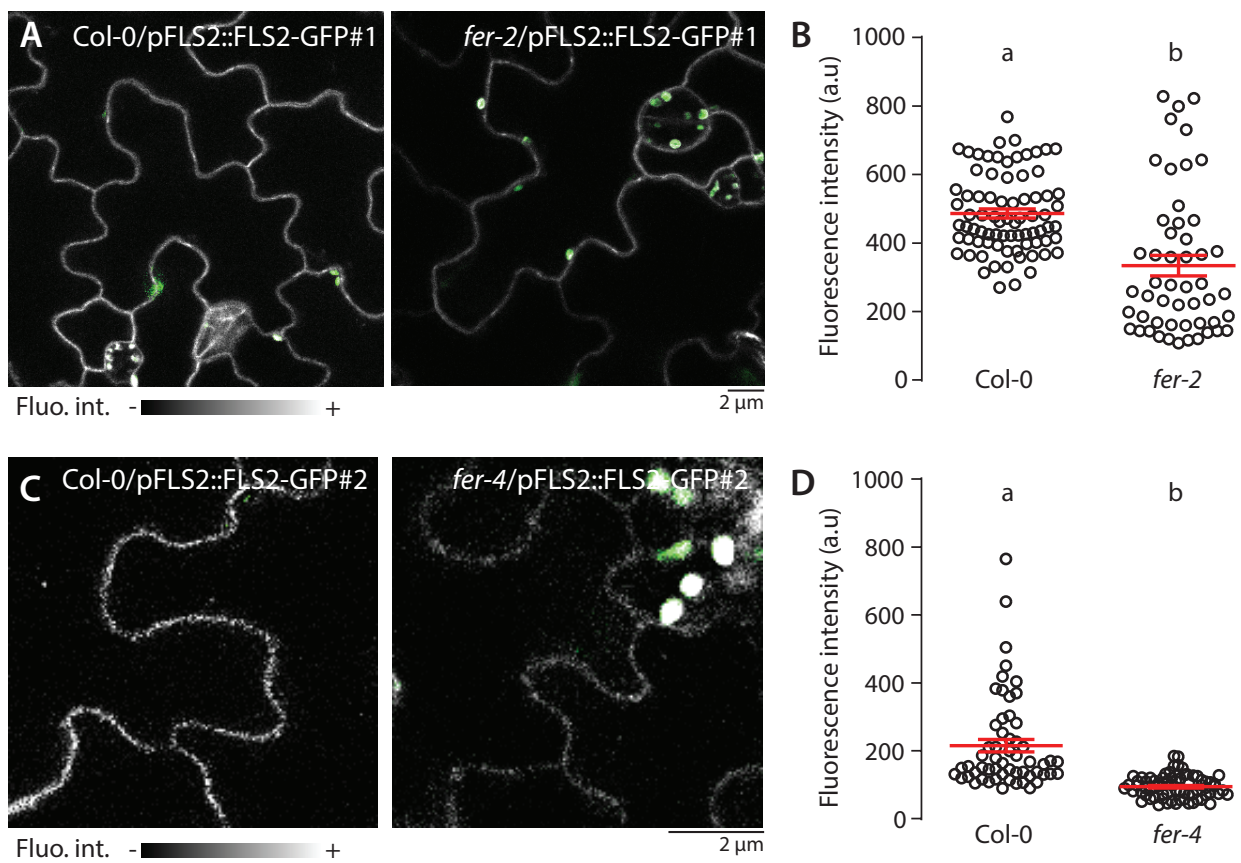

Figure 1 - supplement figure 3 | FLS2-GFP accumulation at the PM is altered in fer mutants.

Supplement: supp [file elife-74162-supp-v1.zip › elife_poa_e74162_Figure_1_figure_supplement_3.pdf]

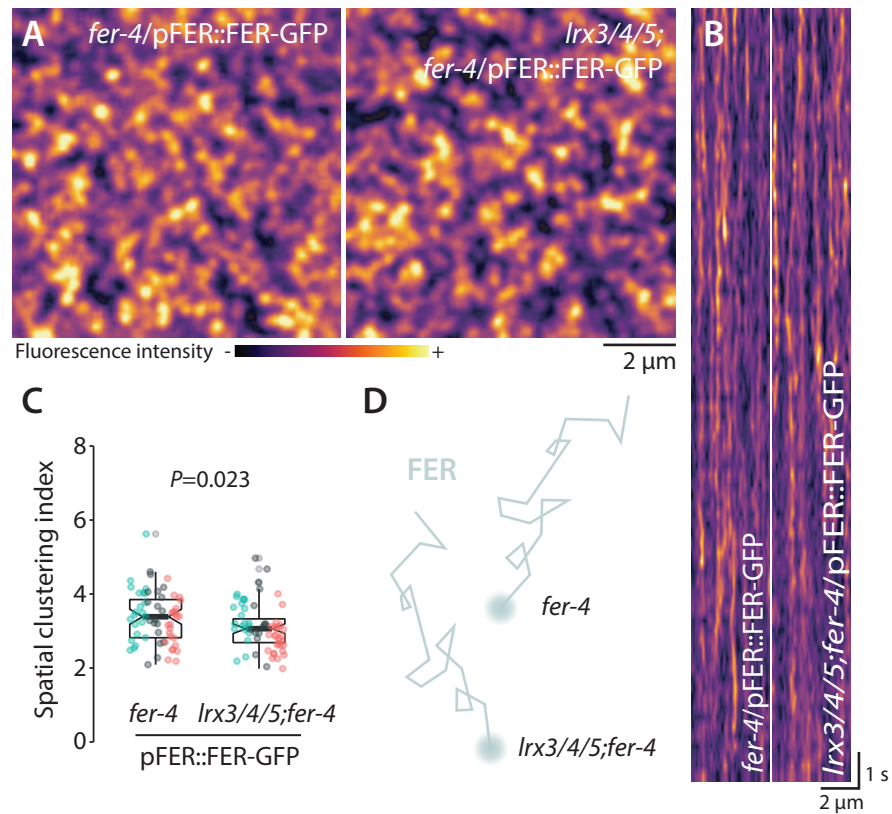

Figure 2 - supplement figure 3 | LRX3, LRX4 and LRX5 are dispensable for FER-GFP nanoscale organization.

Supplement: supp [file elife-74162-supp-v1.zip › elife_poa_e74162_Figure_2_figure_supplement_3.pdf]

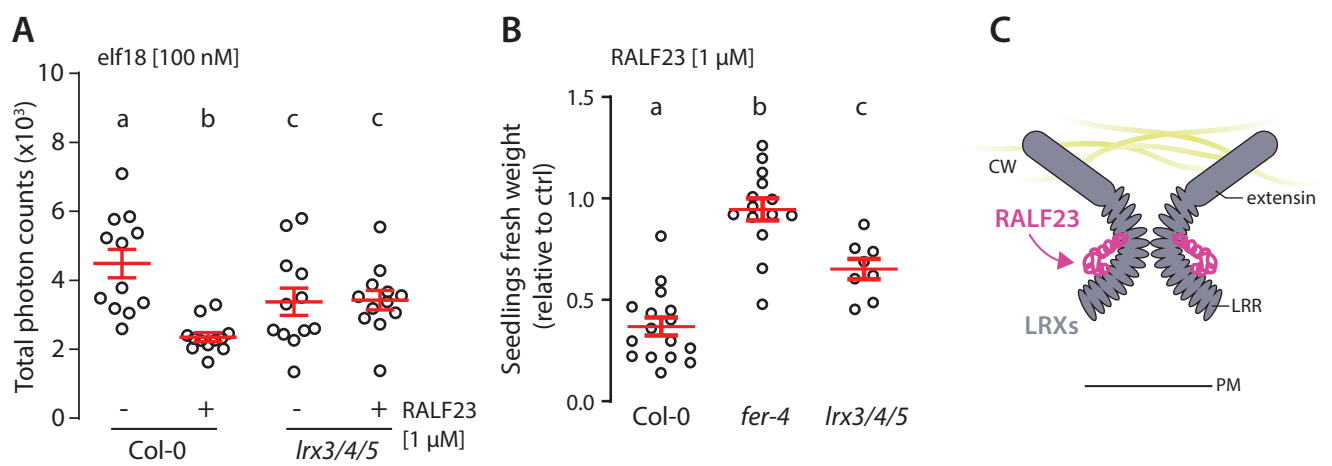

Figure 2 - supplement figure 4 | LRX3, LRX4 and LRX5 contribute to RALF23 responsiveness.

Supplement: supp [file elife-74162-supp-v1.zip › elife_poa_e74162_Figure_2_figure_supplement_4.pdf]

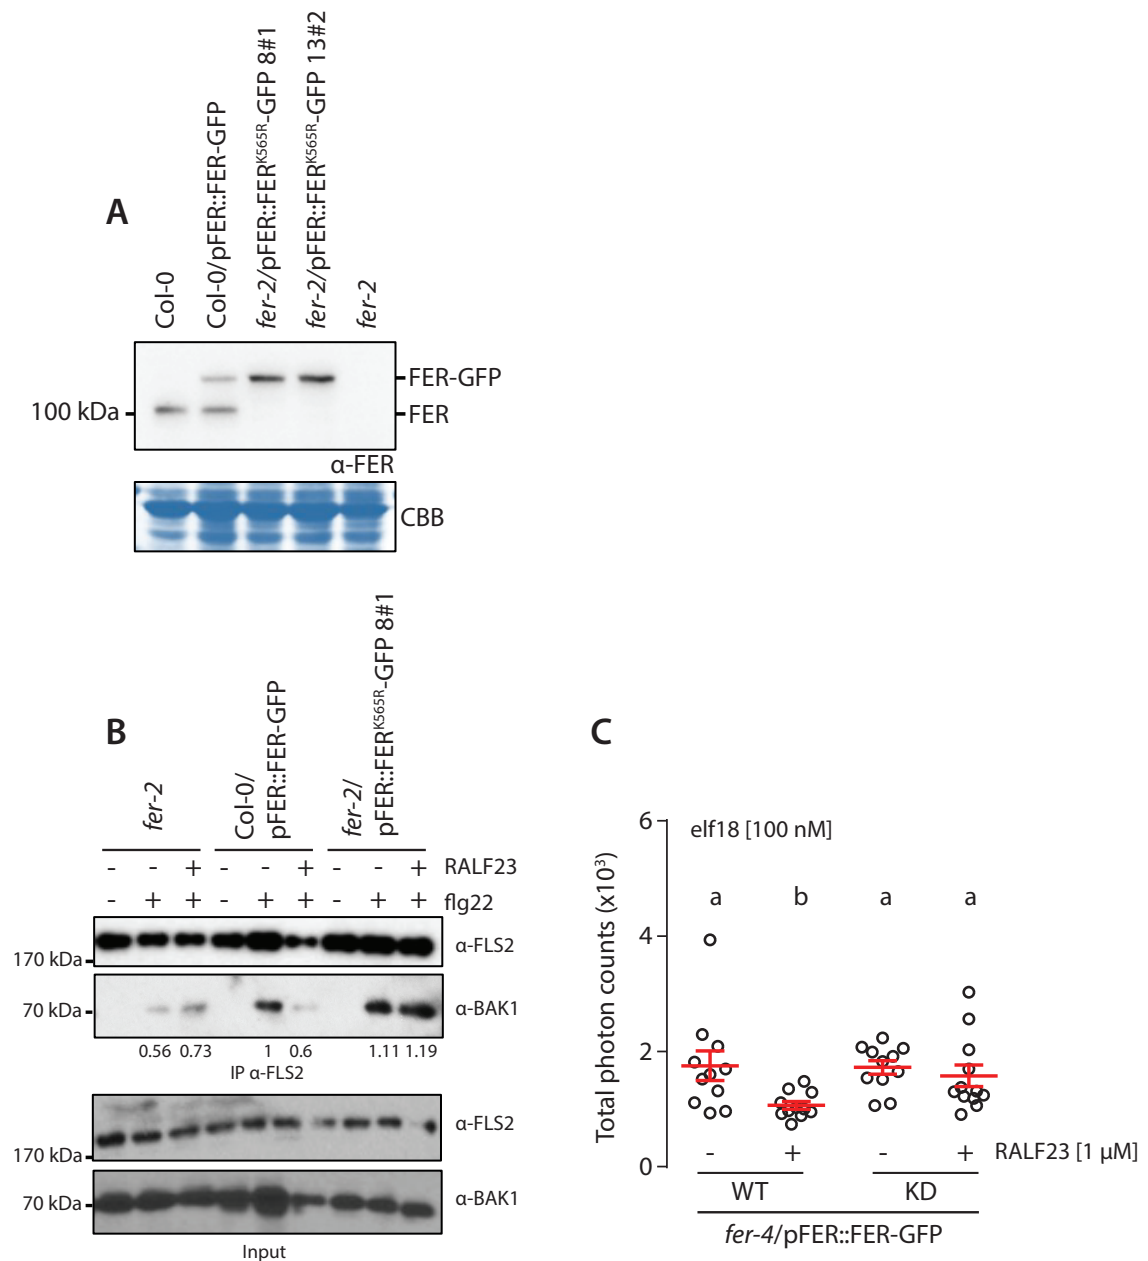

Figure 4 - supplement figure 2 | Inhibition of PTI signaling by RALF23 requires FER kinase activity.

Supplement: supp [file elife-74162-supp-v1.zip › elife_poa_e74162_Figure_4_figure_supplement_2.pdf]

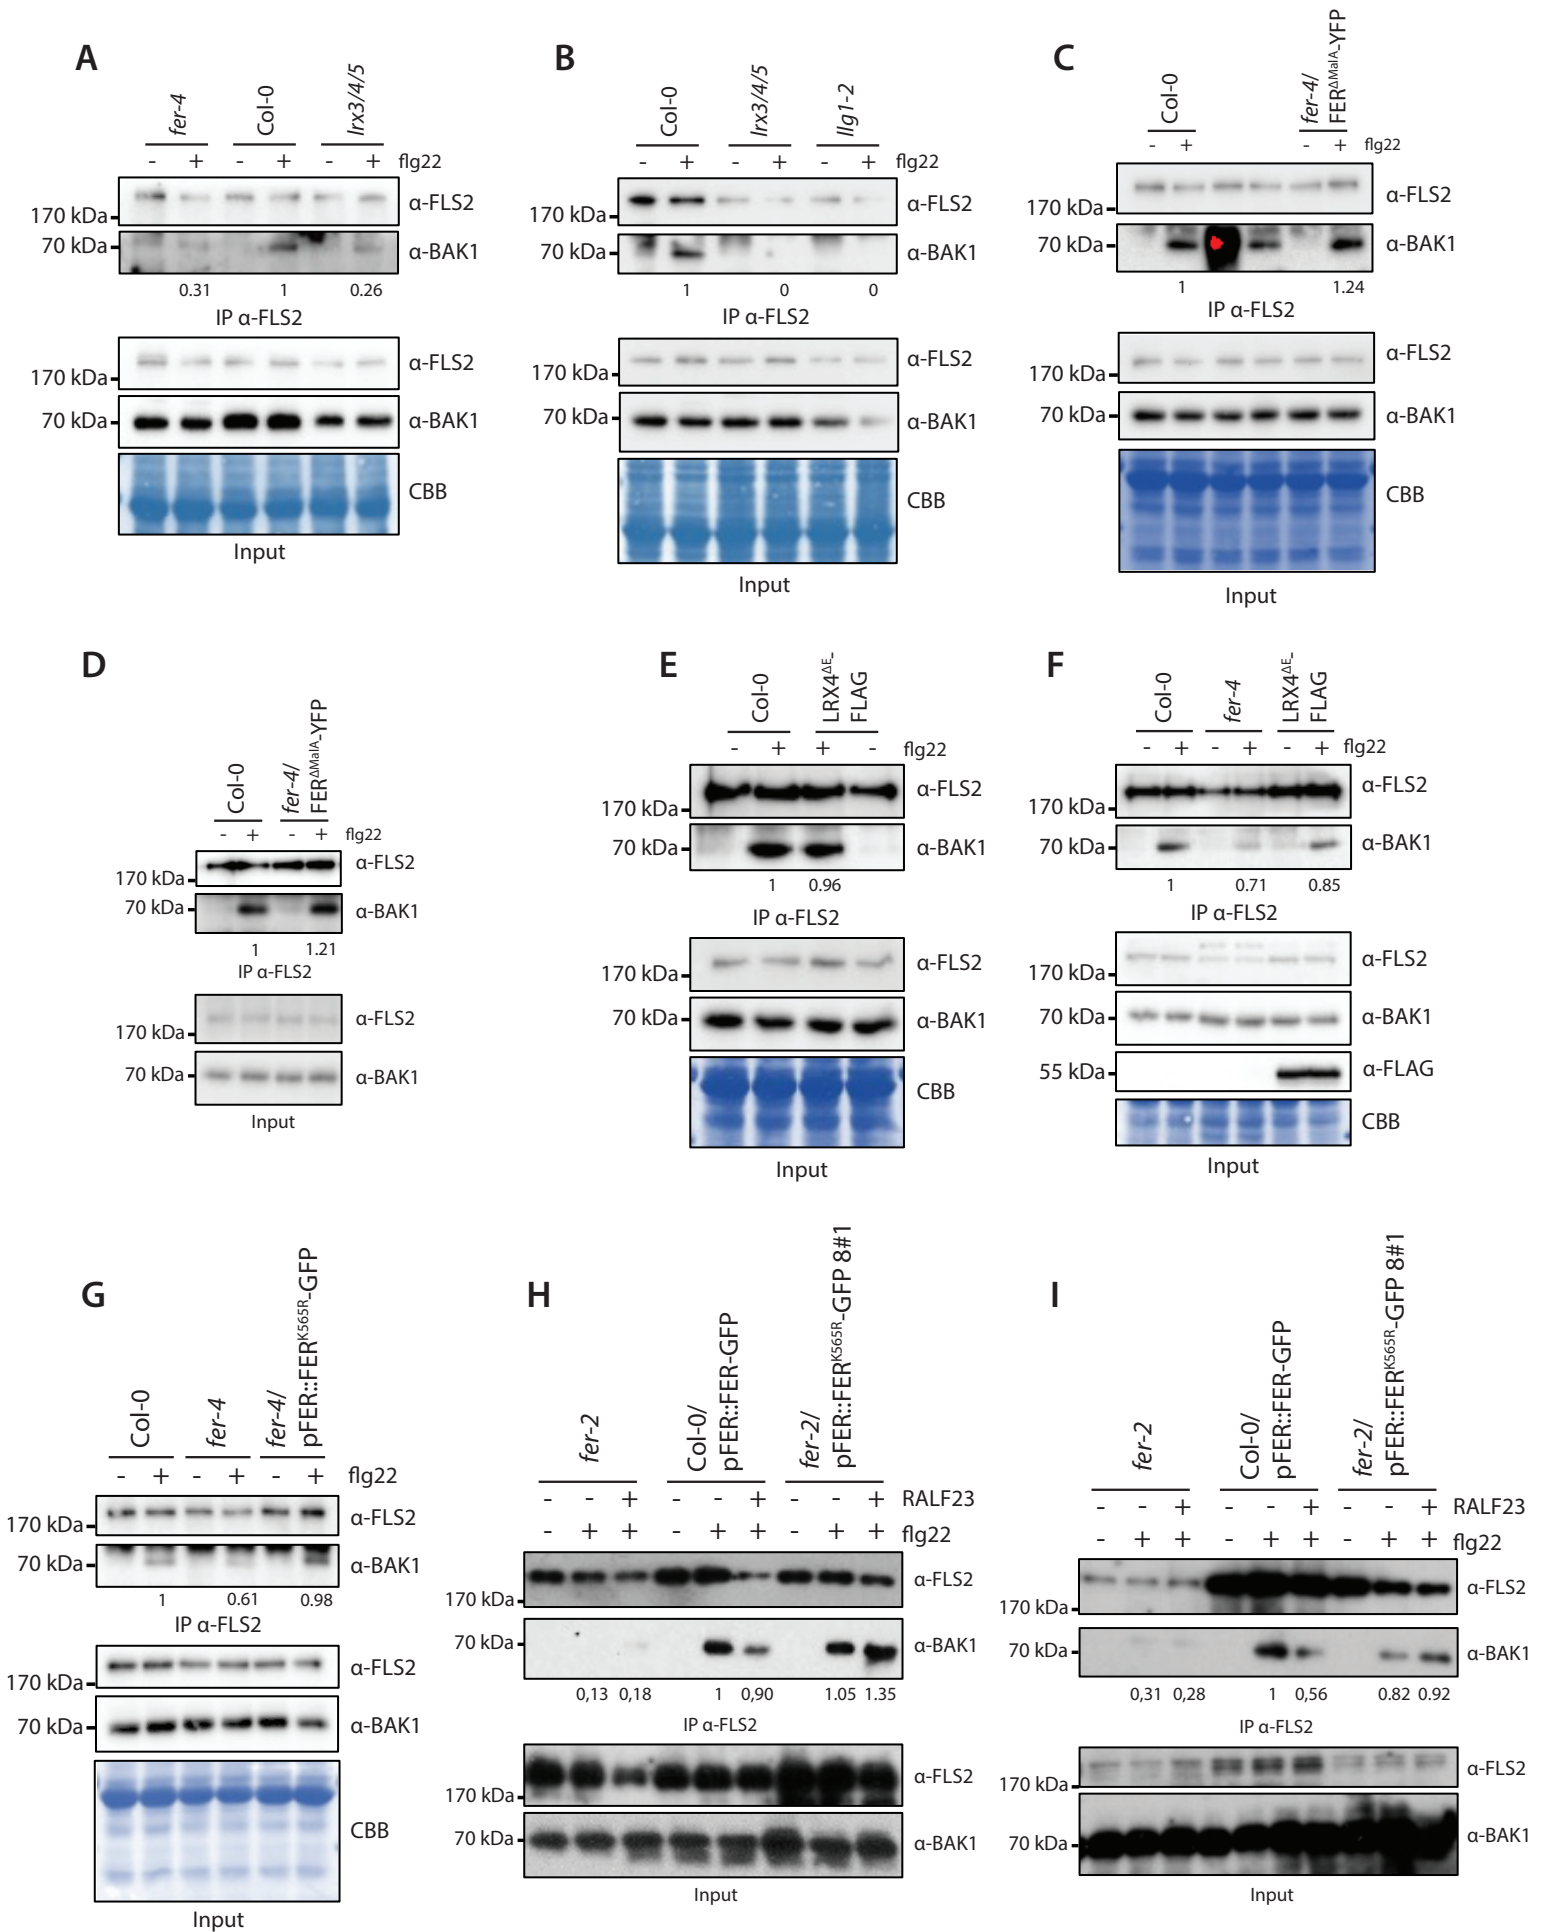

Figure 4 - supplement figure 8 | Replicate of co-immunoprecipitation experiments.

Supplement: supp [file elife-74162-supp-v1.zip › elife_poa_e74162_Figure_4_figure_supplement_8.pdf]
